# Supplementary material
Source: publisher figshare collection journal article supplement (https://frontiersin.figshare.com/ndownloader/files/24779153)

# Melting curve chart of lnc/mRNAs selected for RT-qPCR

LNC\_002426

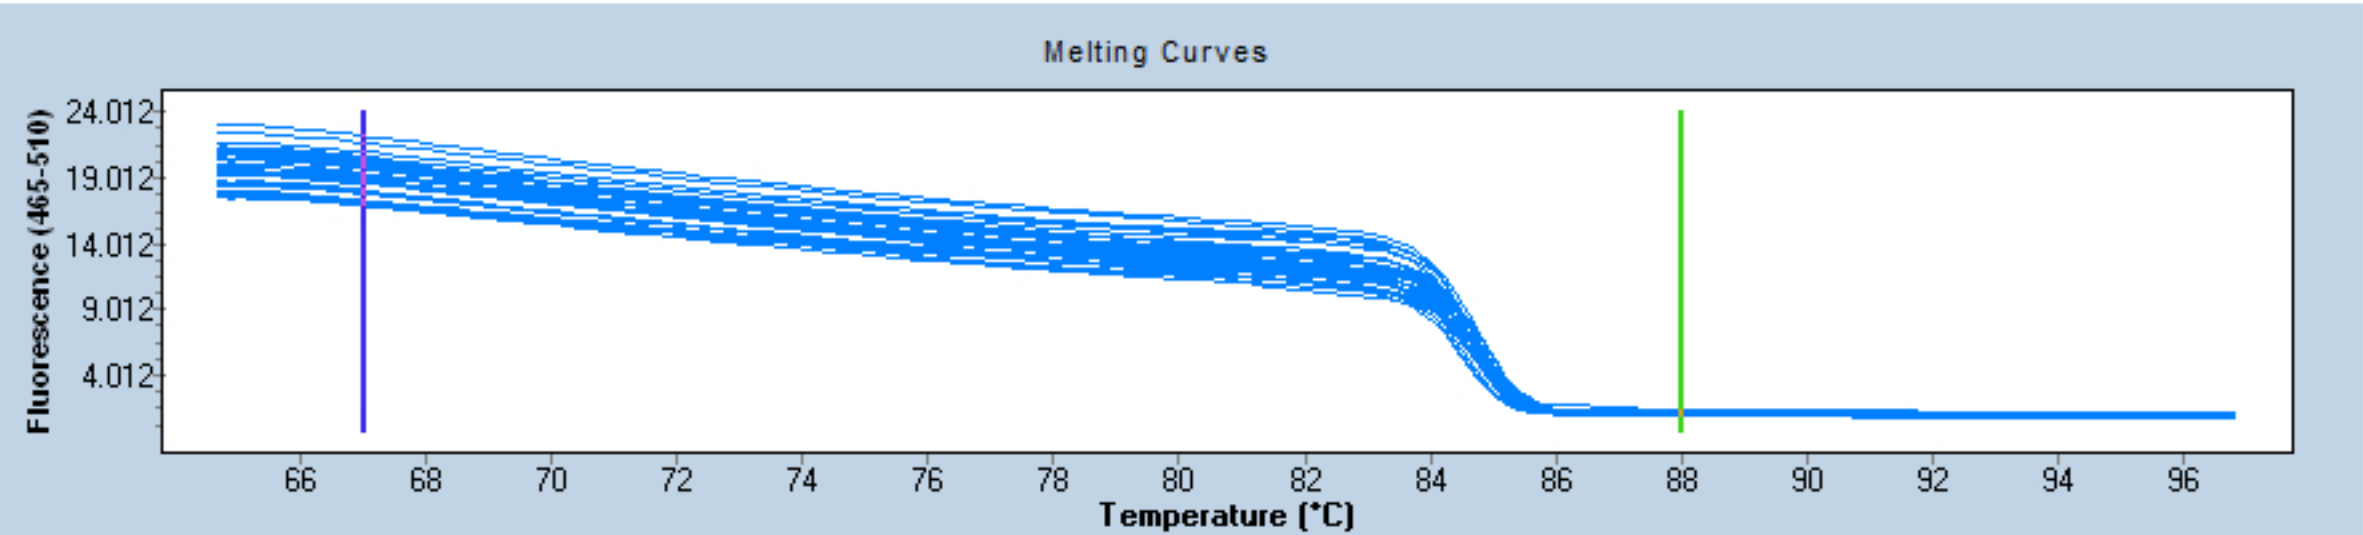

LNC\_002540

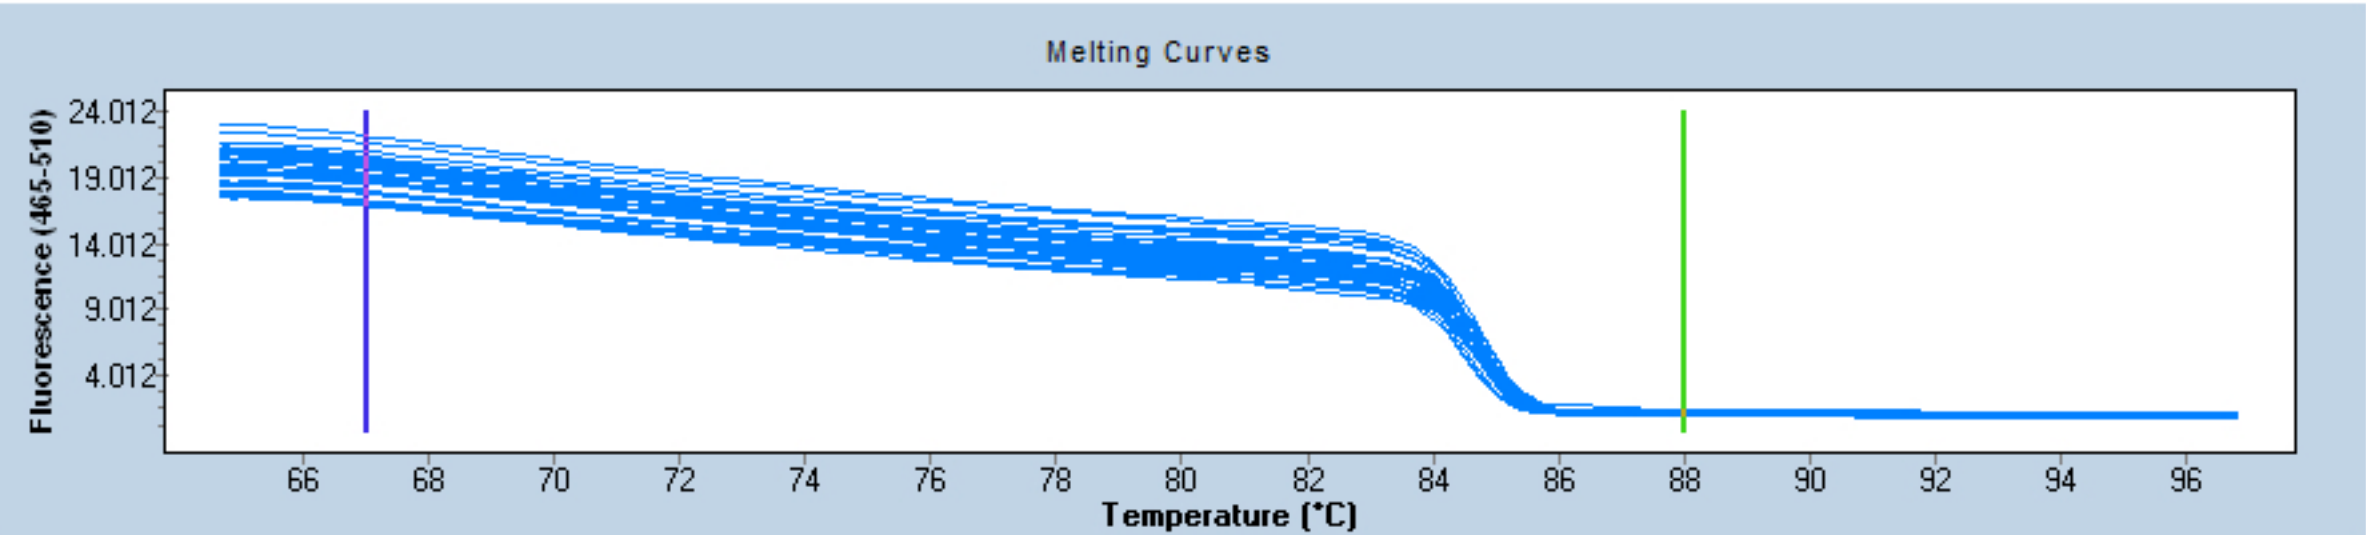

LNC\_011254

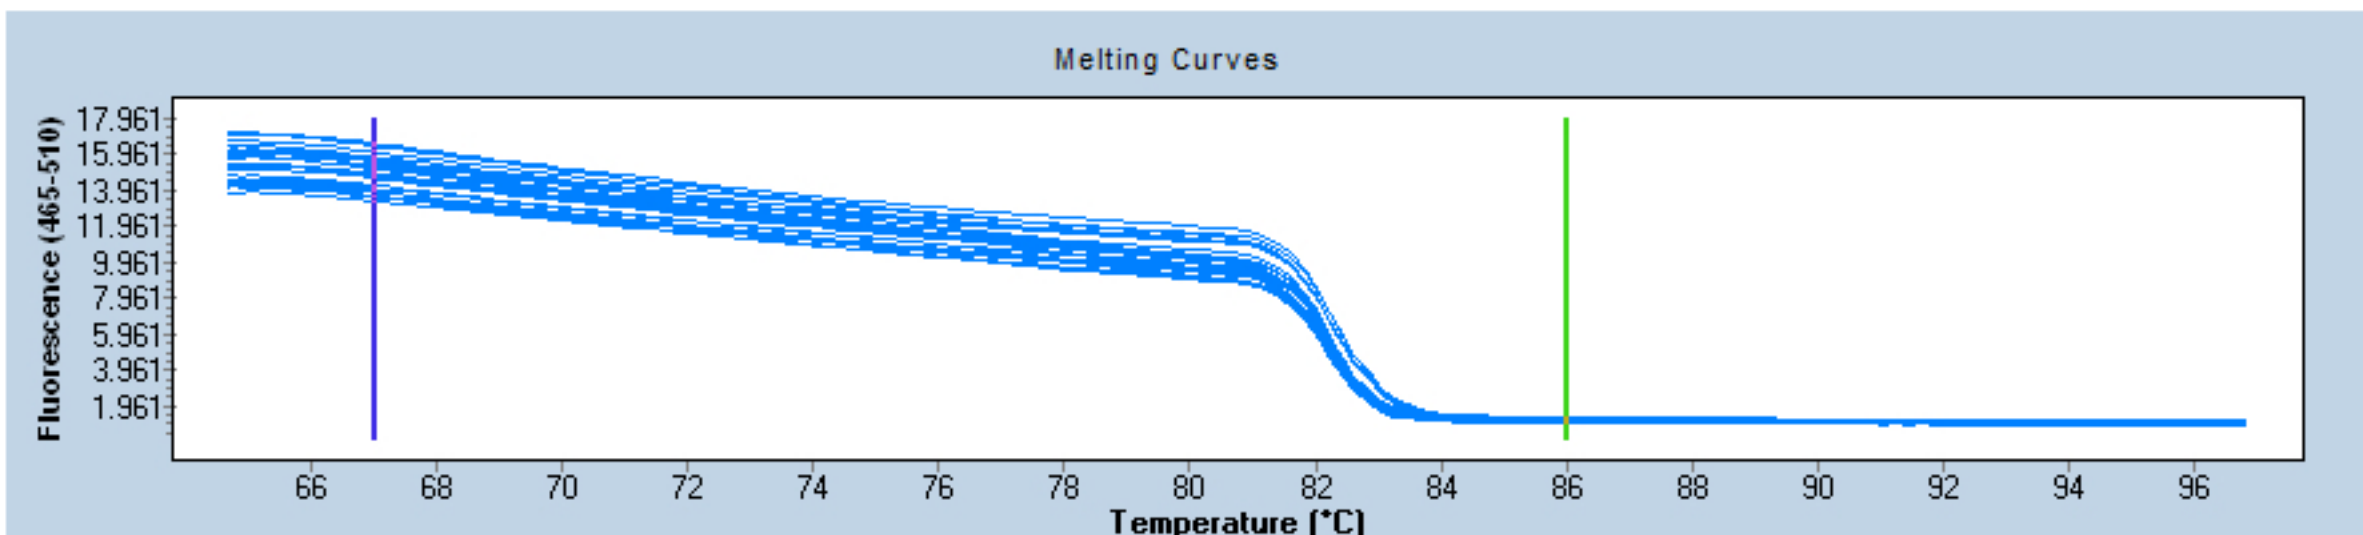

LNC\_014194

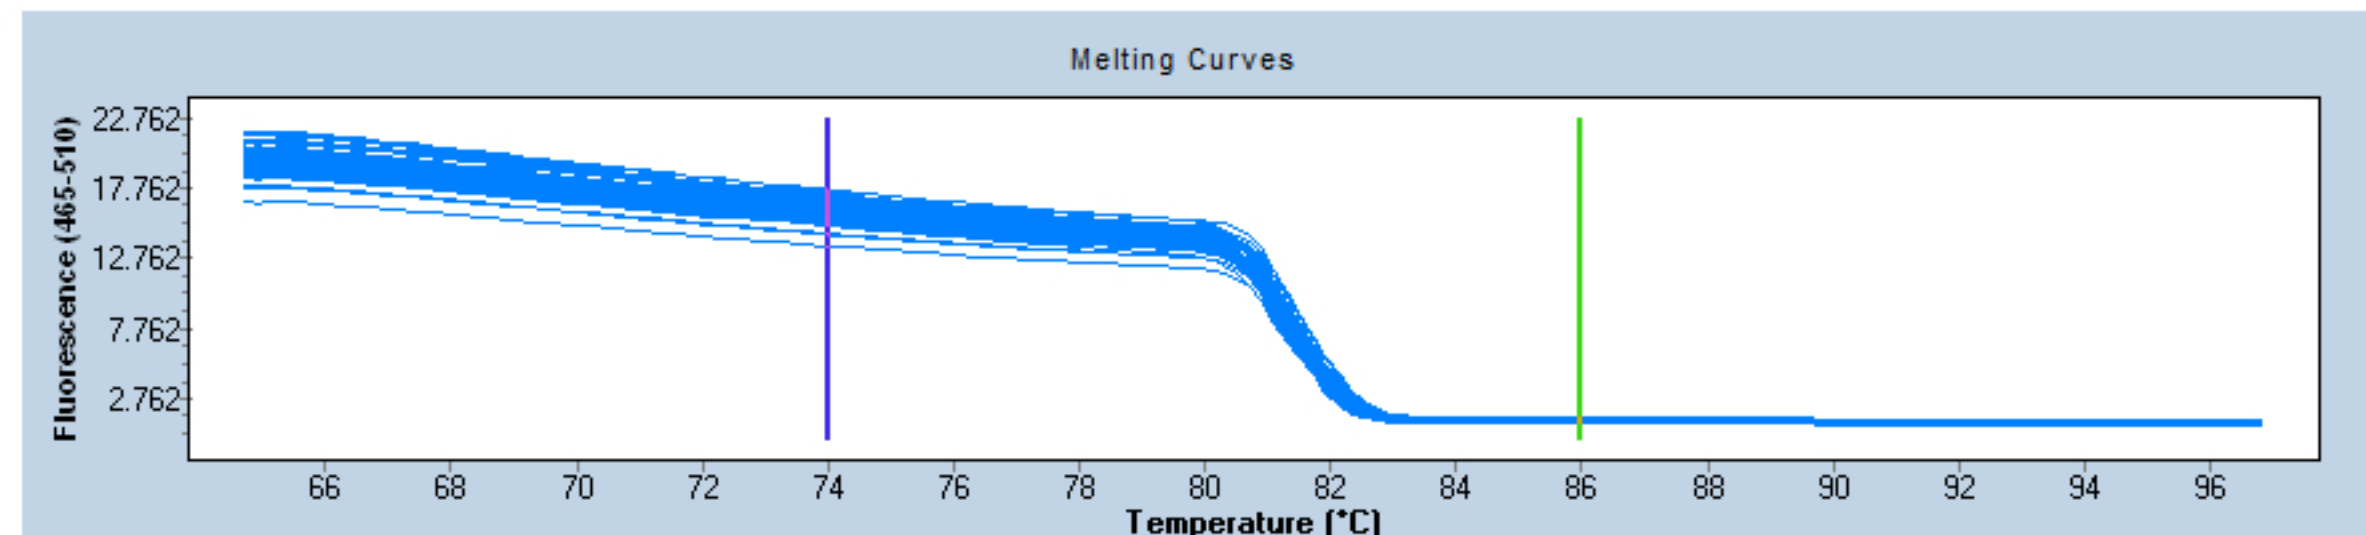

LNC\_015020

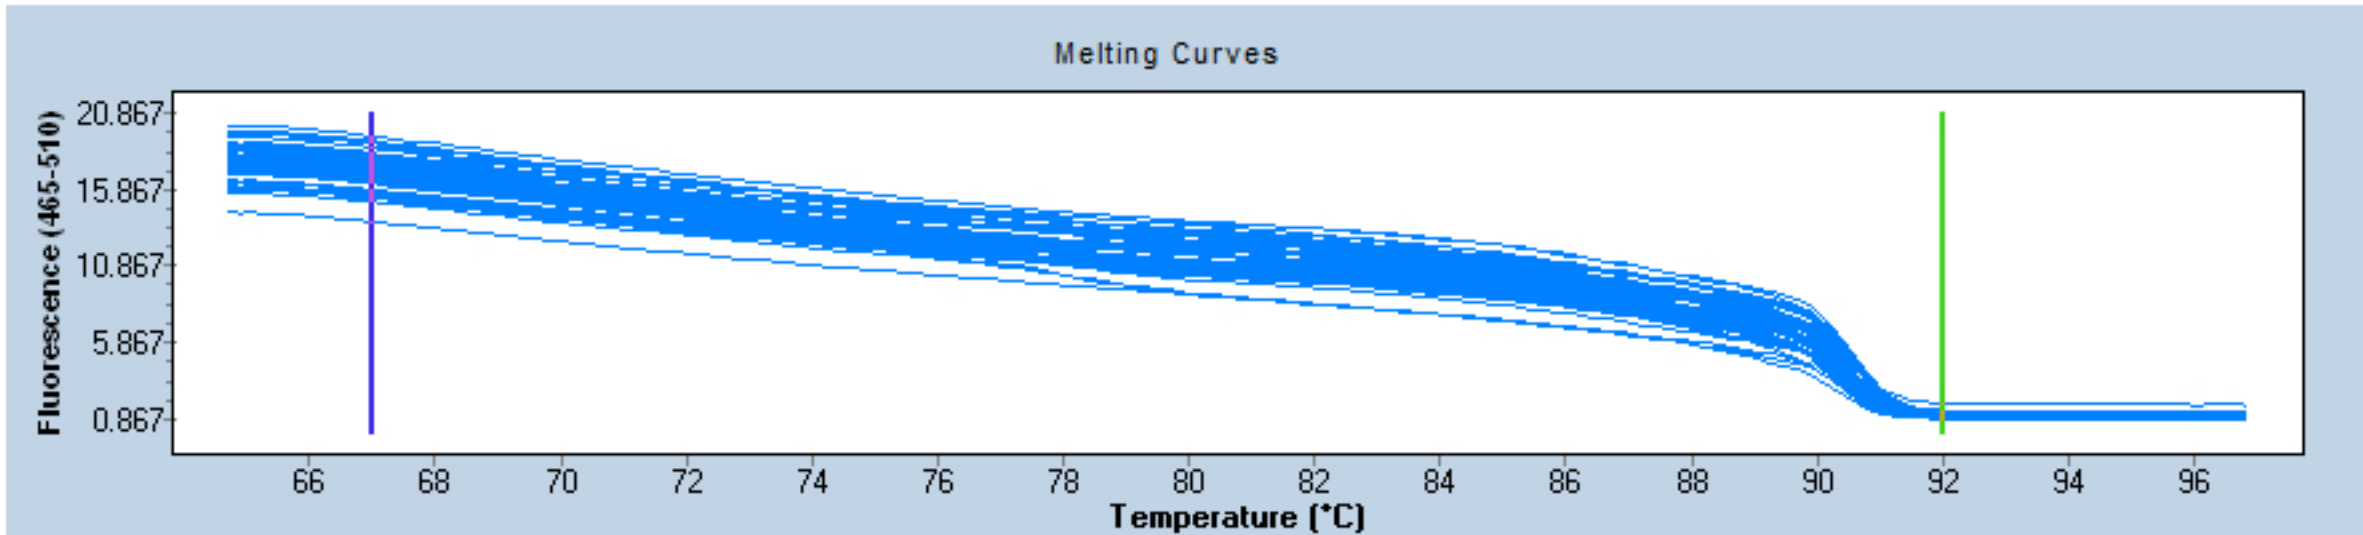

LNC\_018655

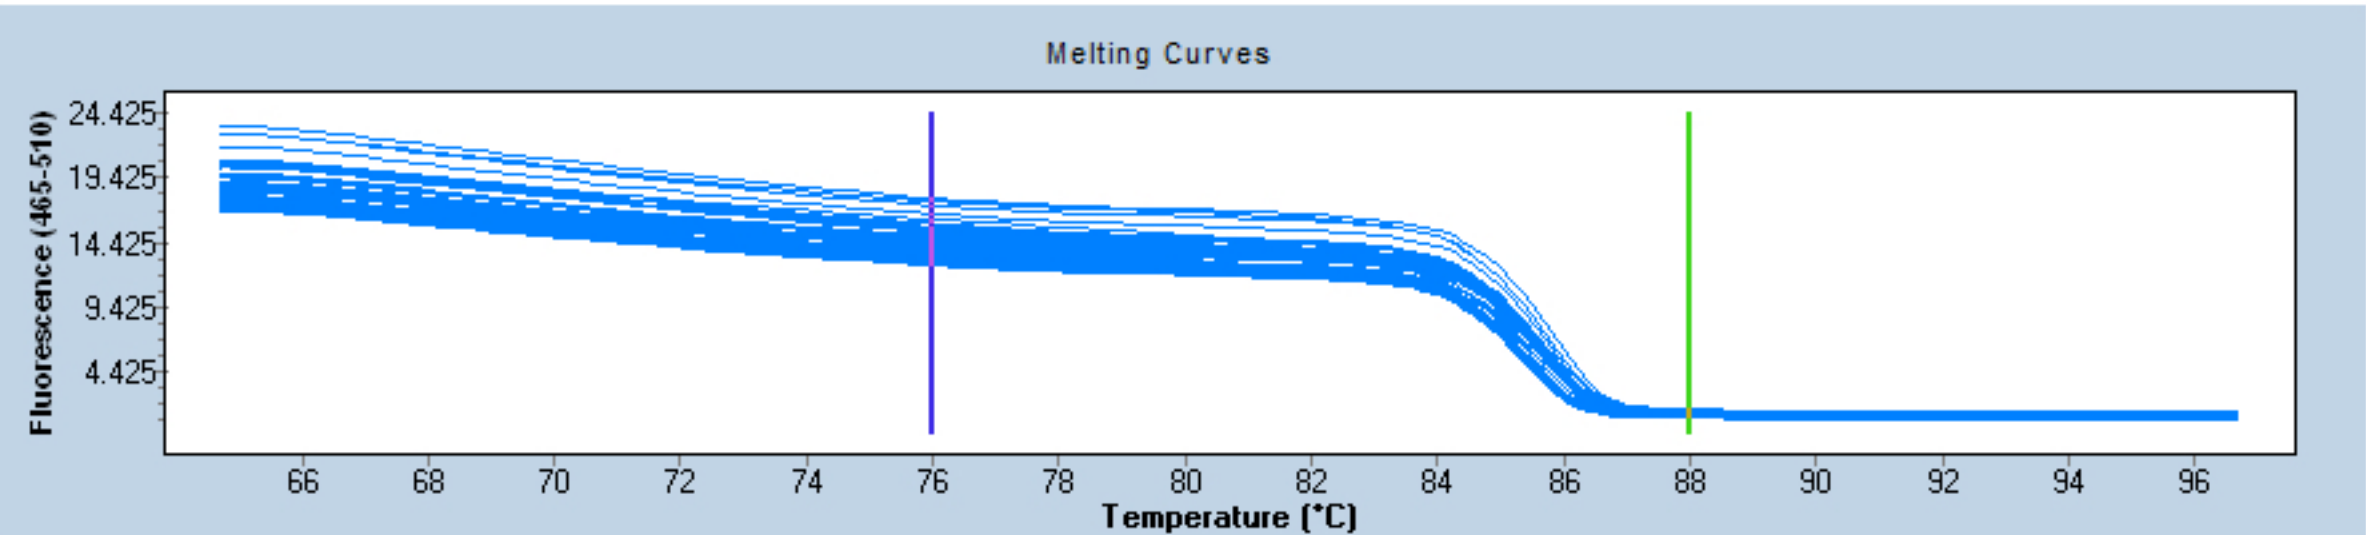

CDCA7

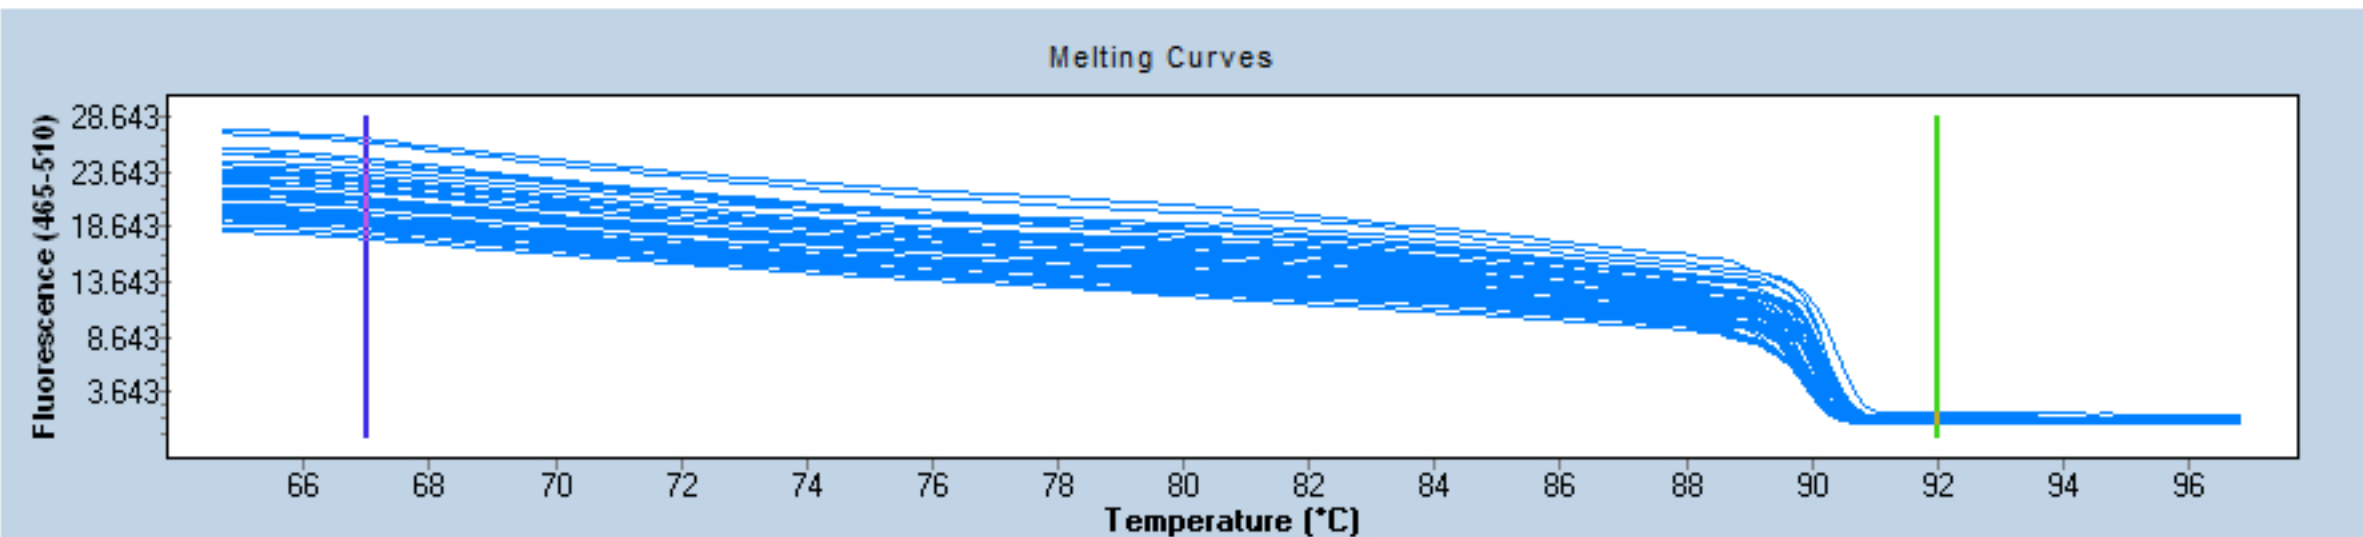

COL3A1

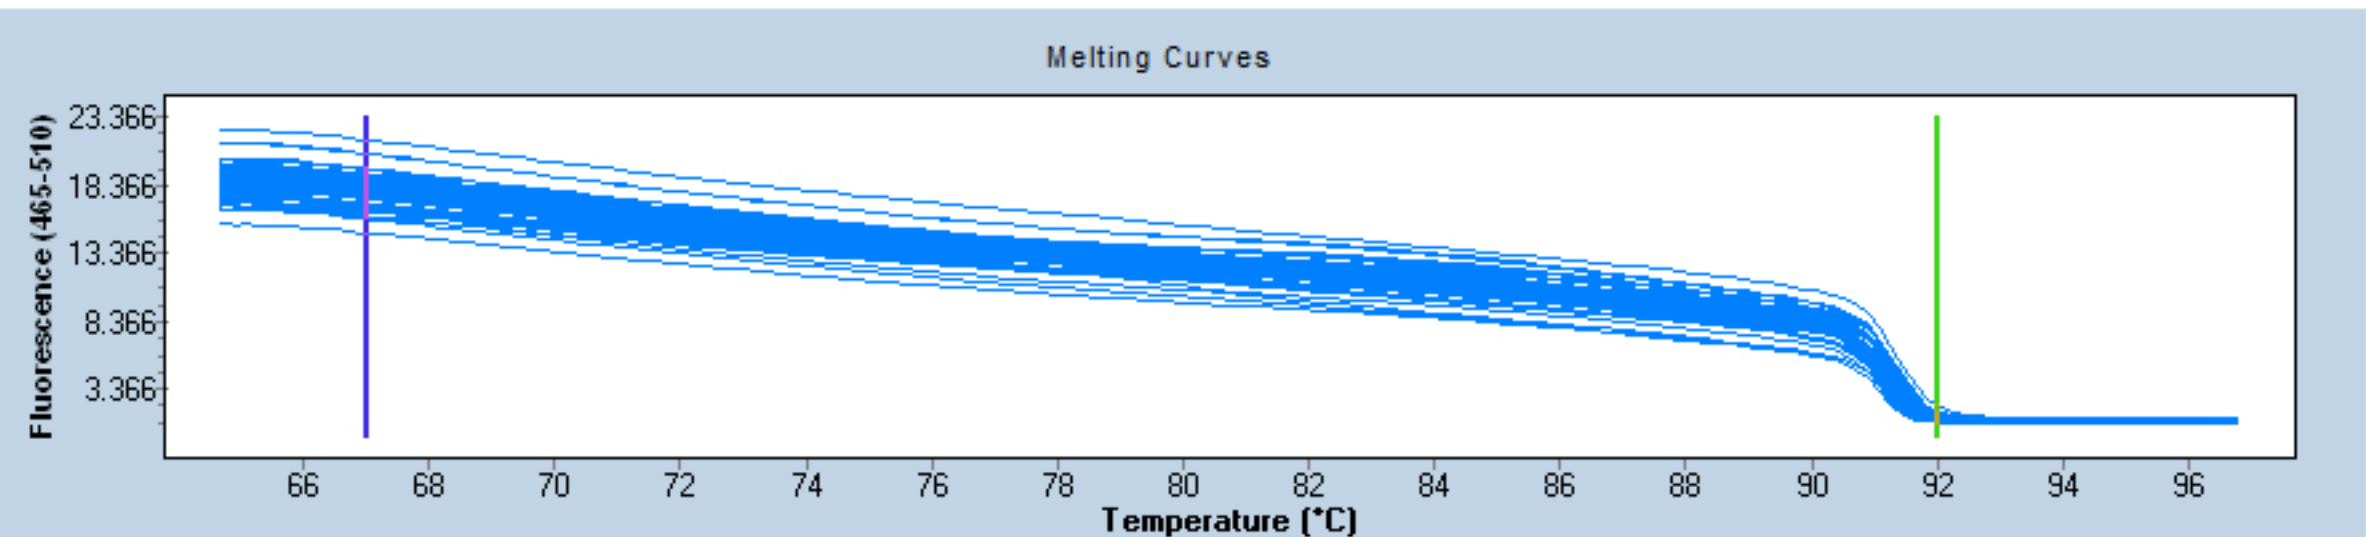

ECM2

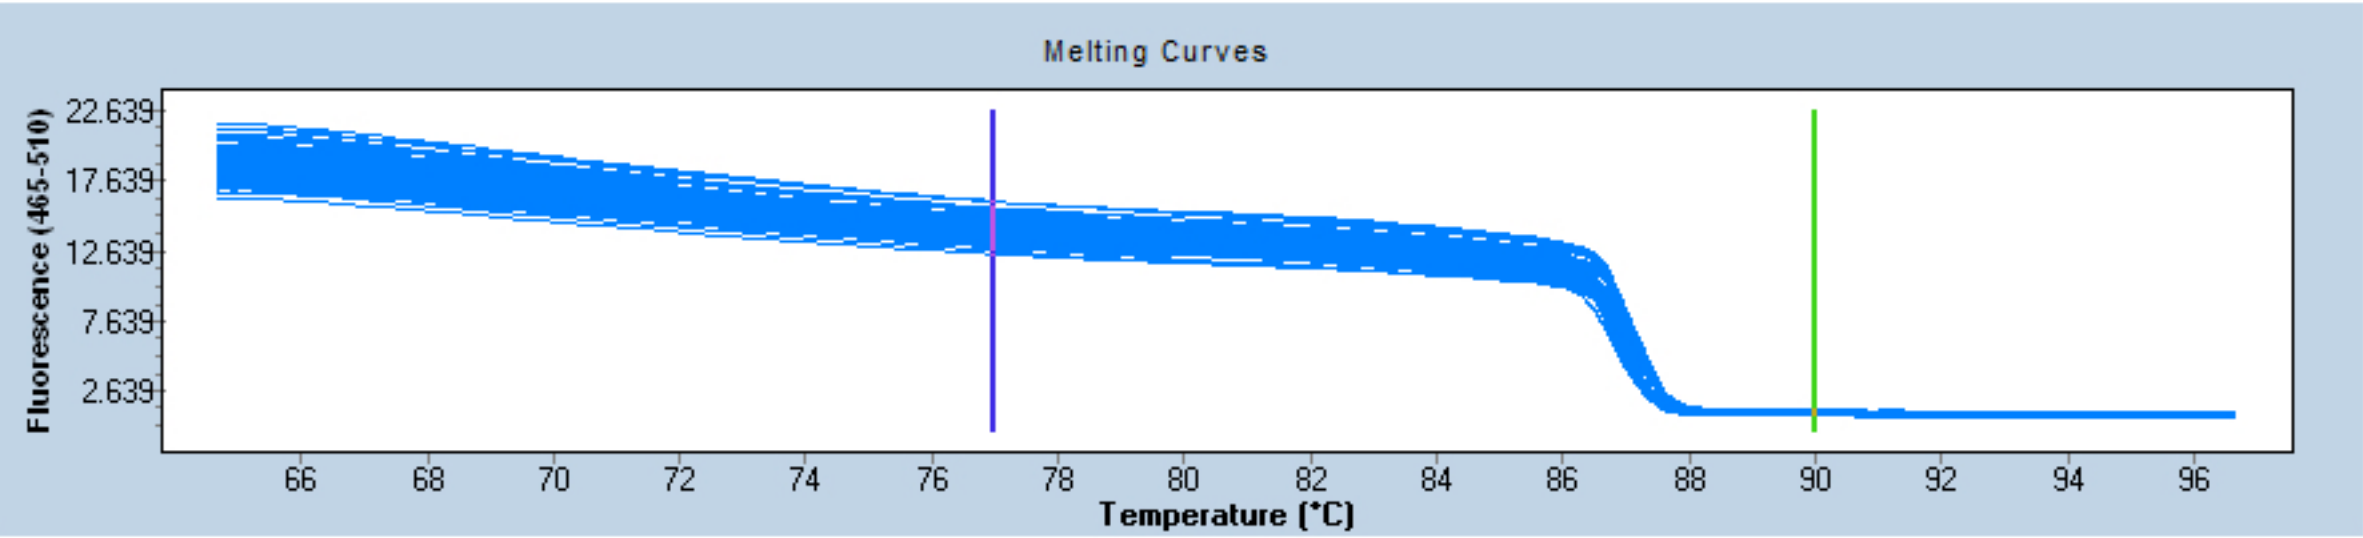

GMNT

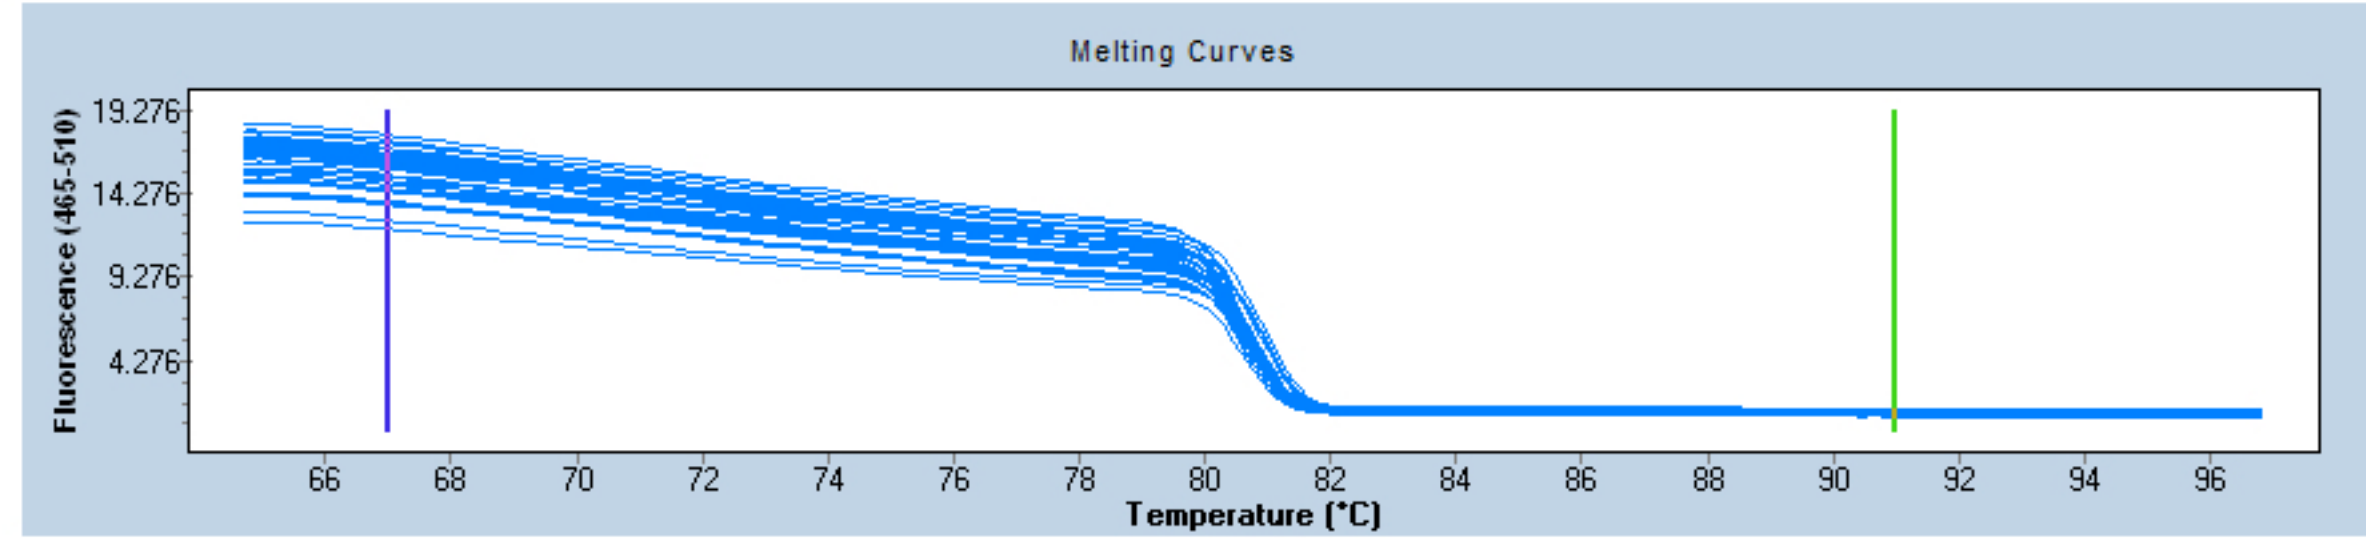

SDC2

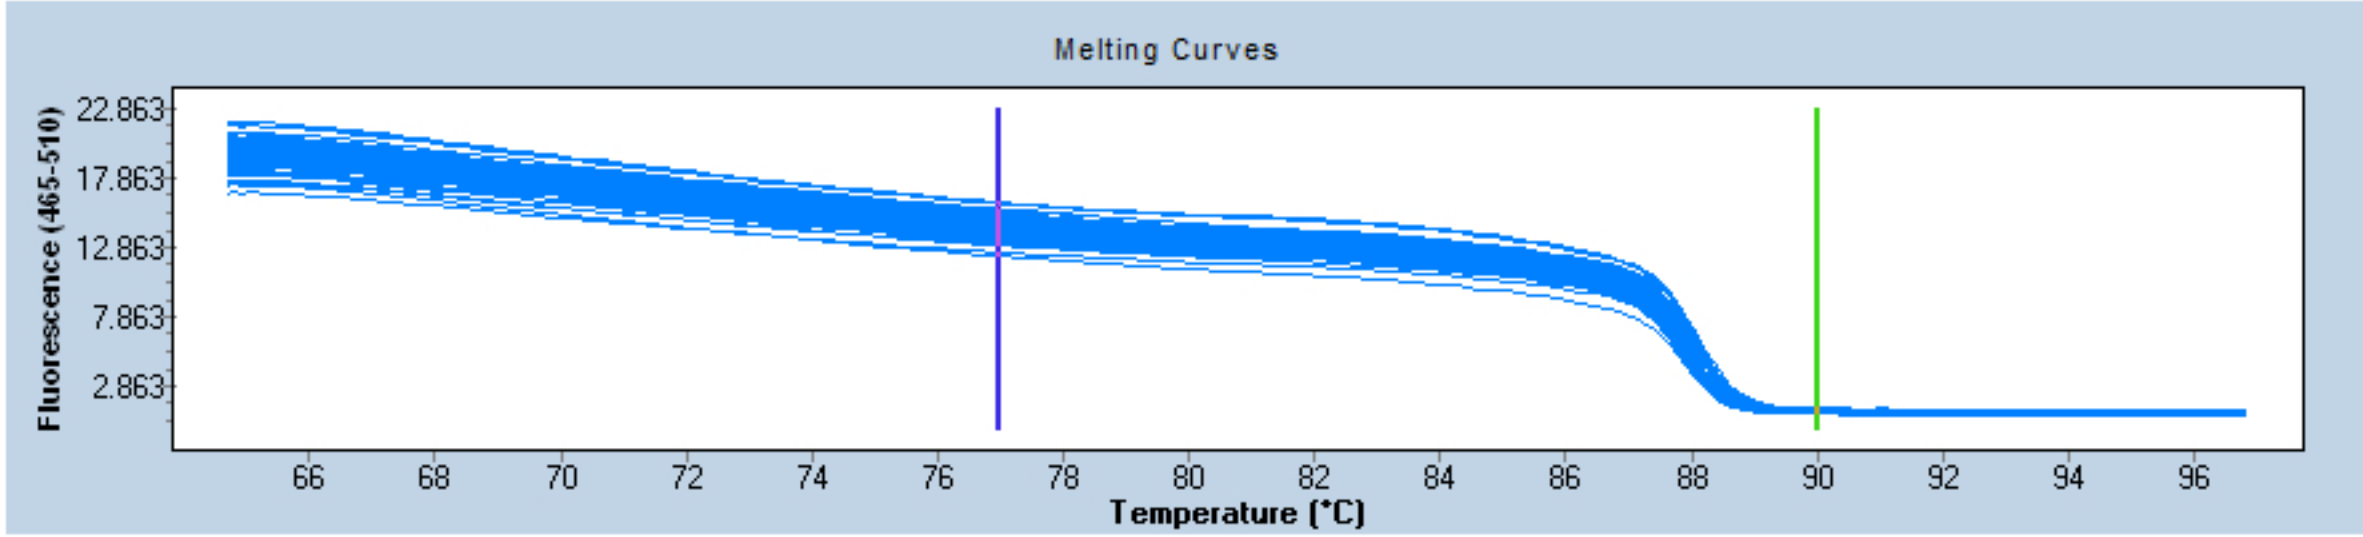

WARS

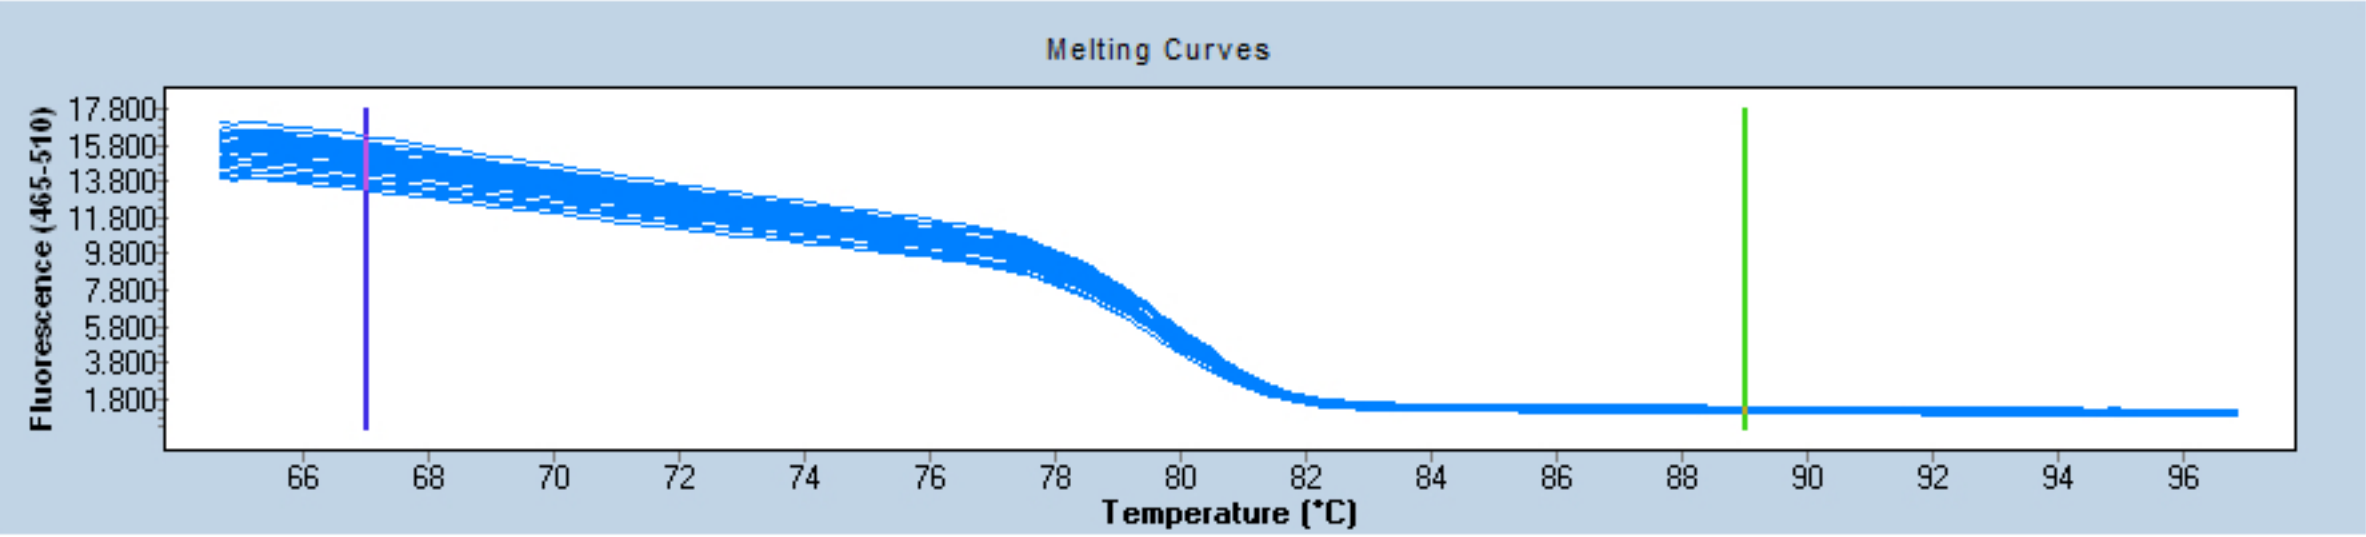



# Melting peak chart of lnc/mRNAs selected for RT-qPCR

LNC\_002426

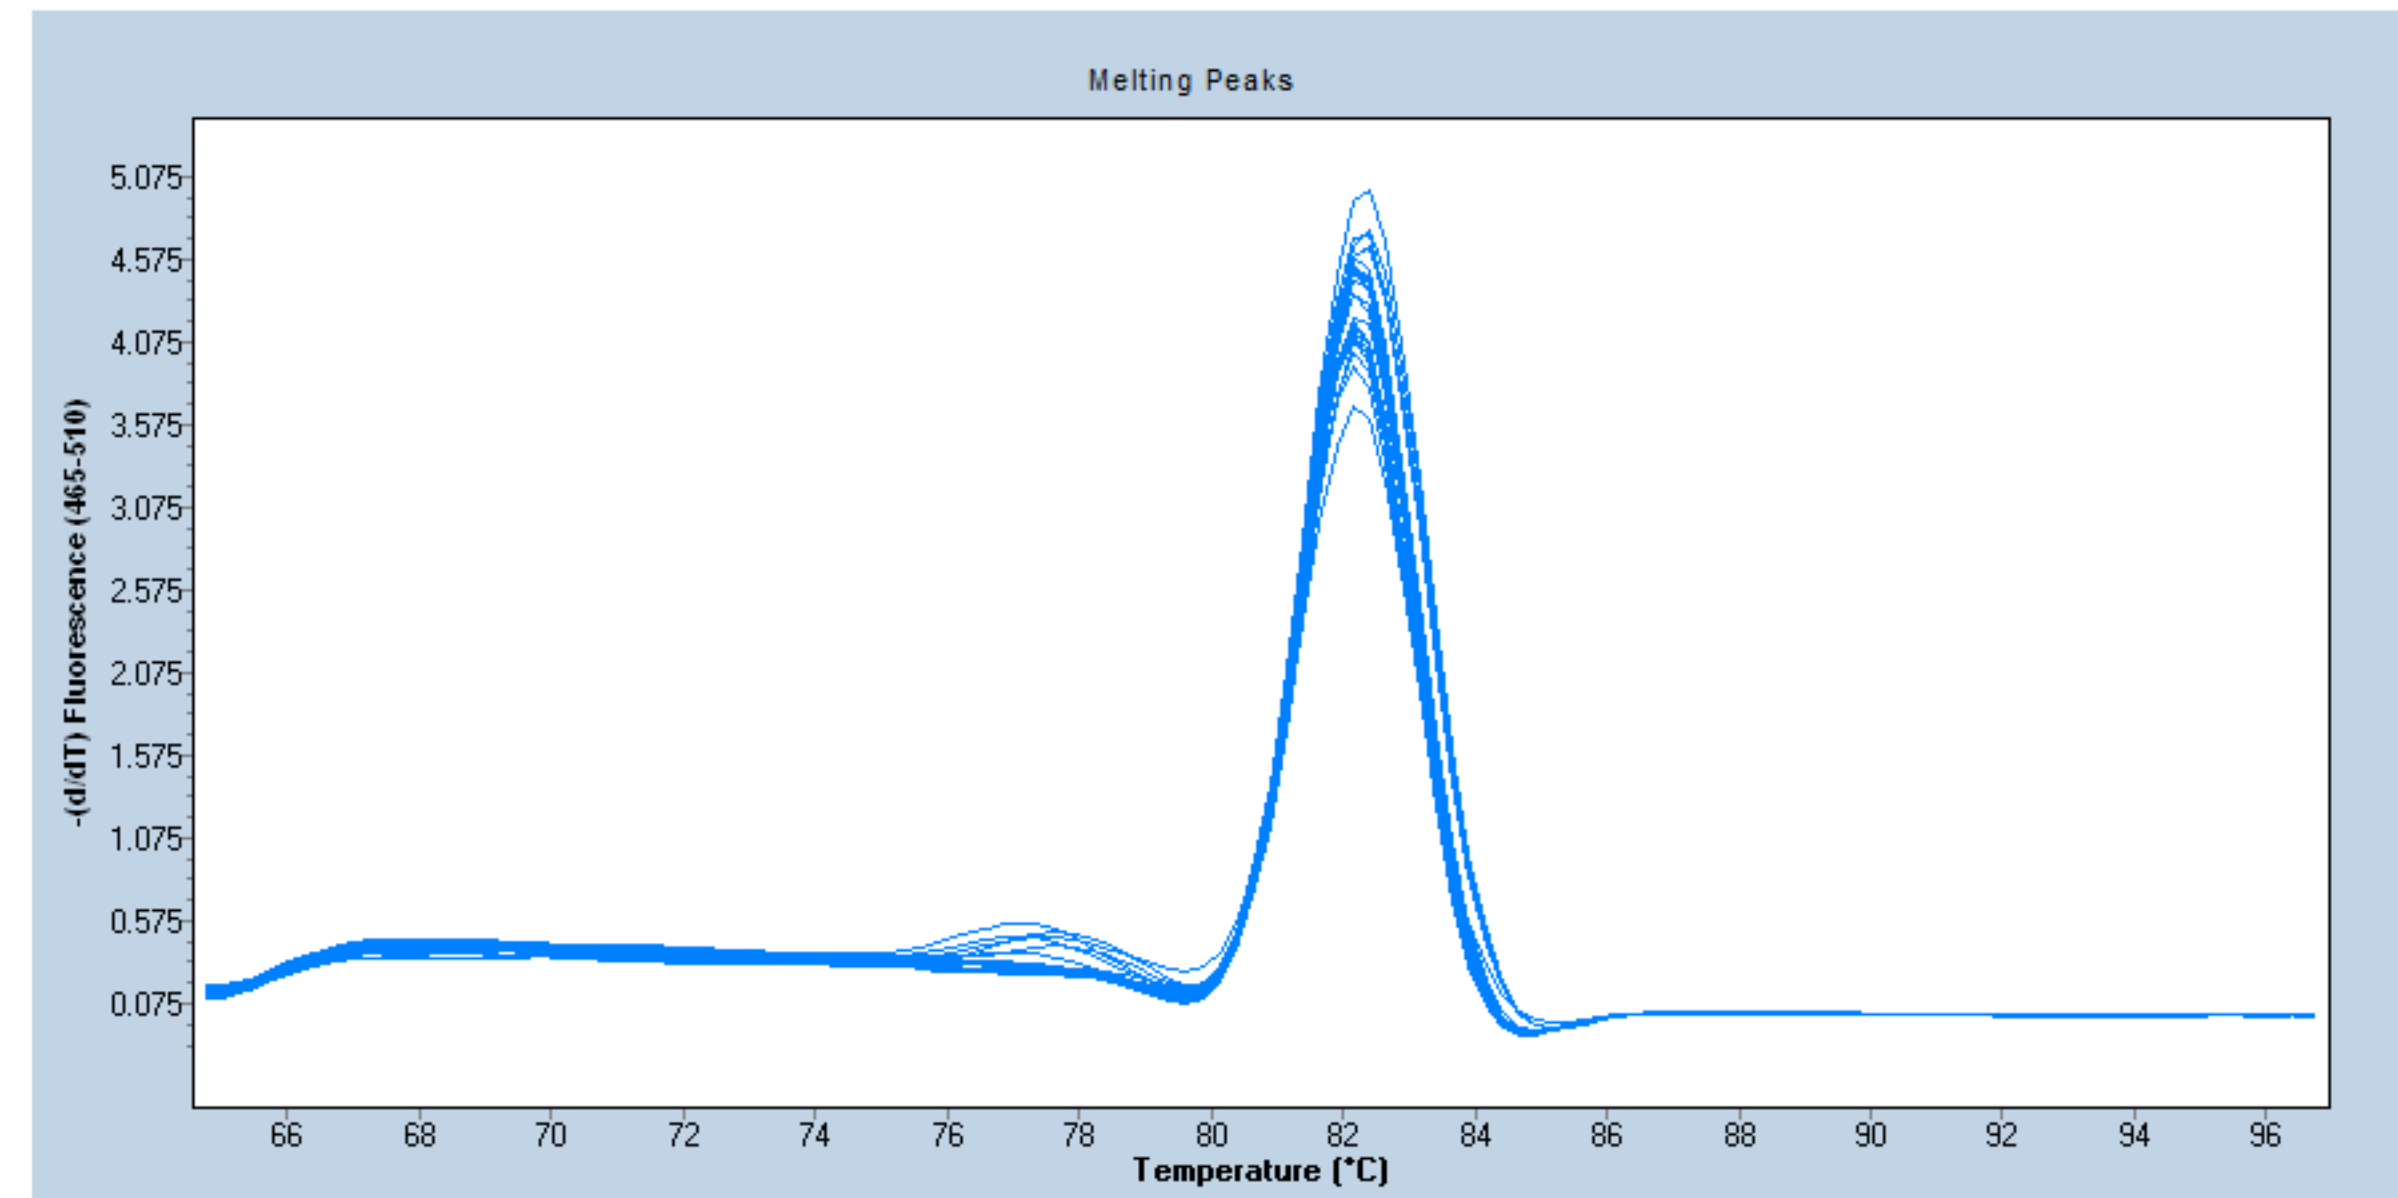

LNC\_002540

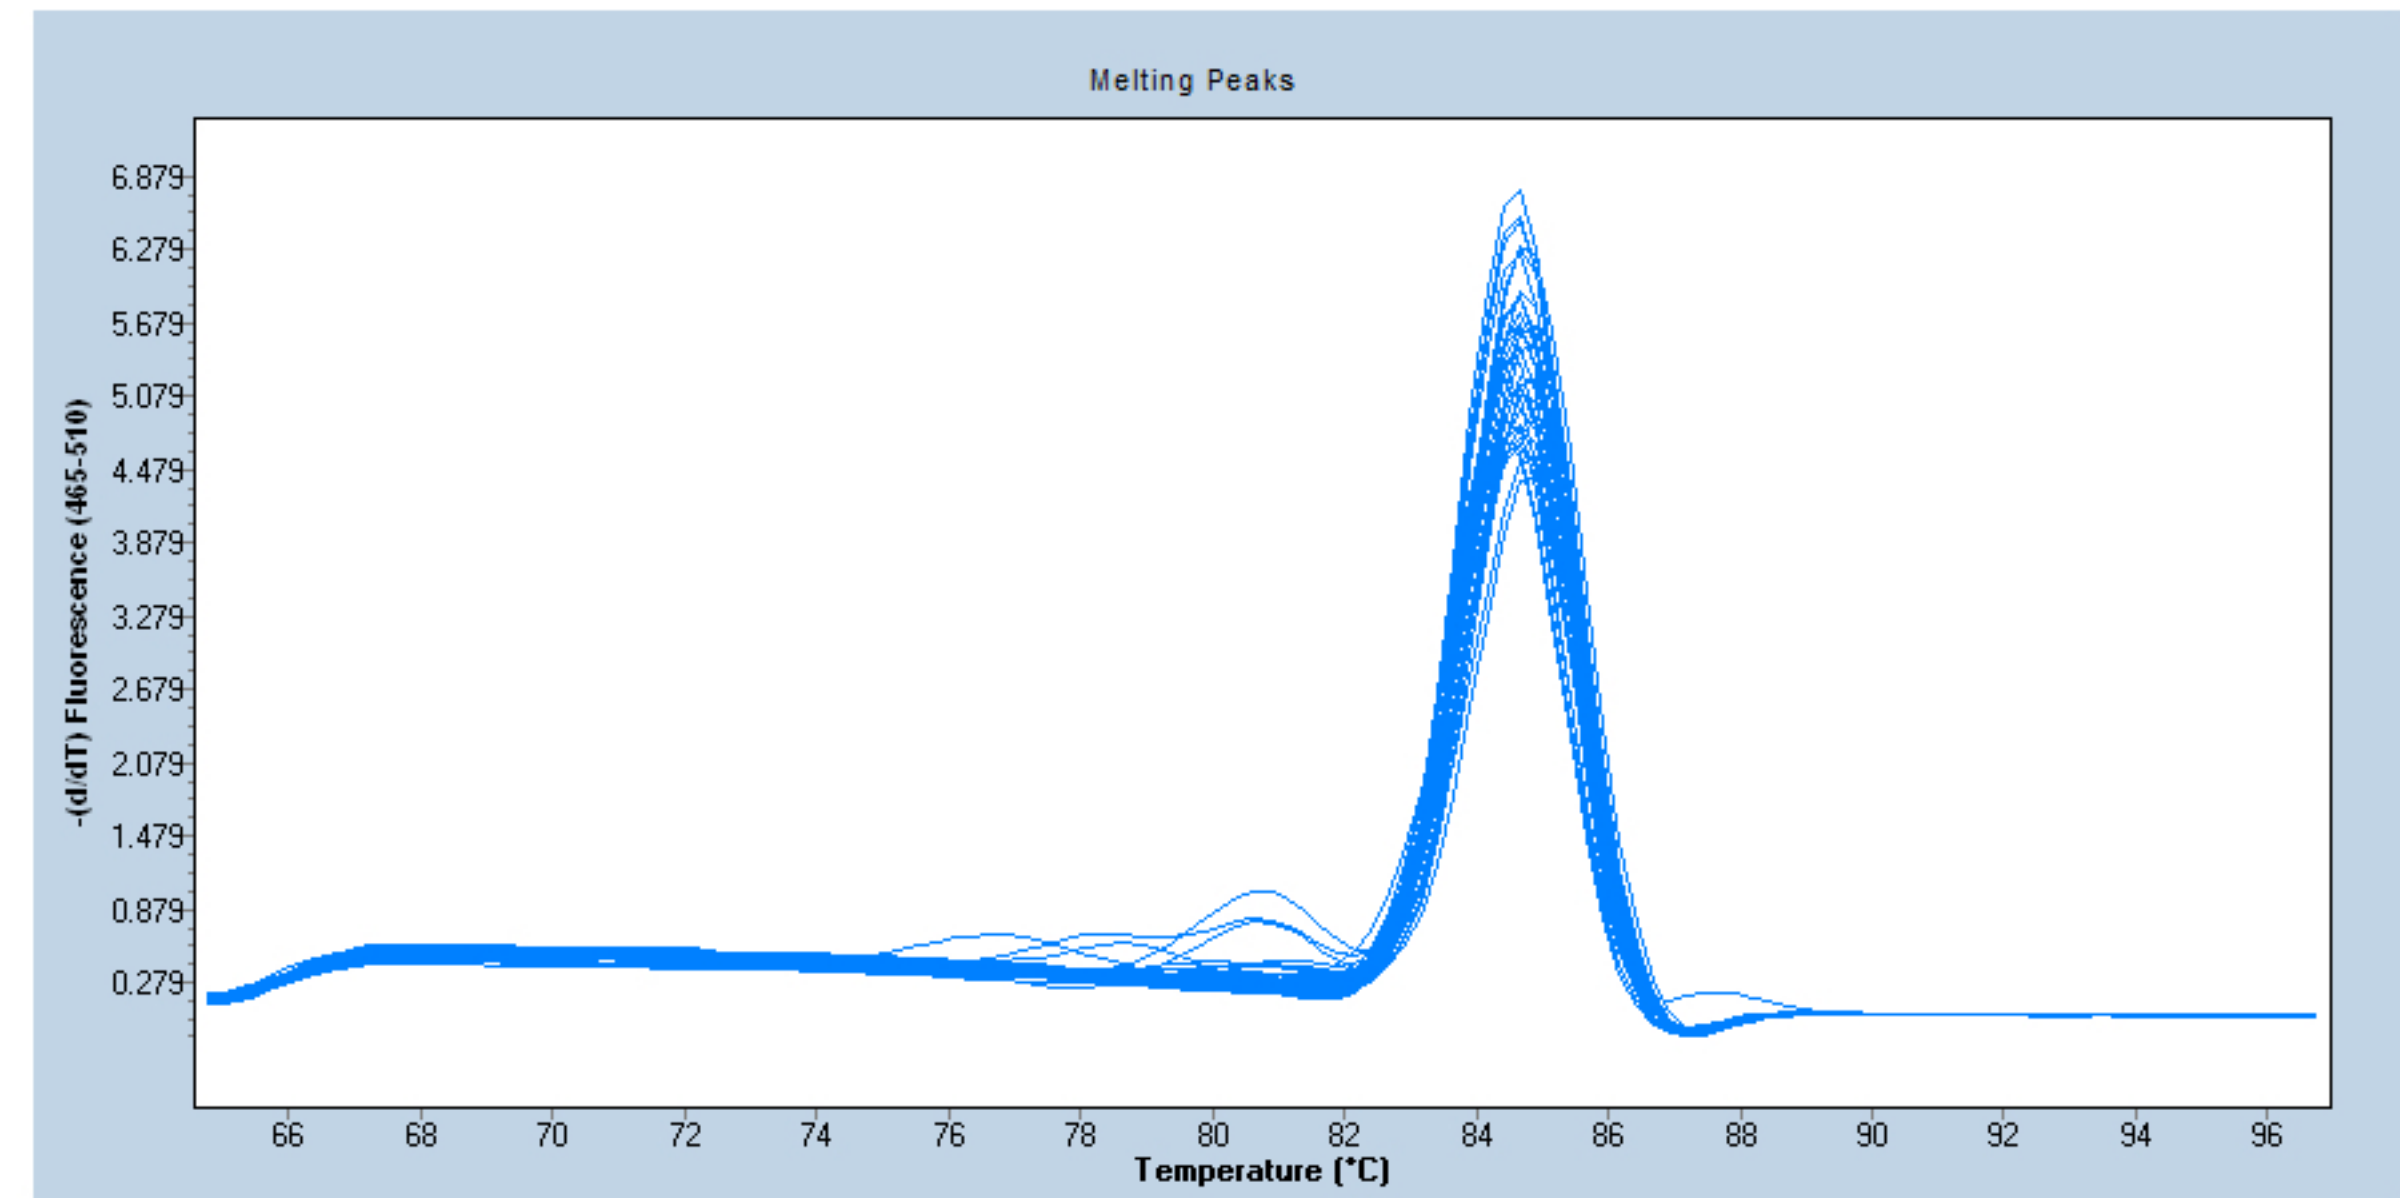

LNC\_011254

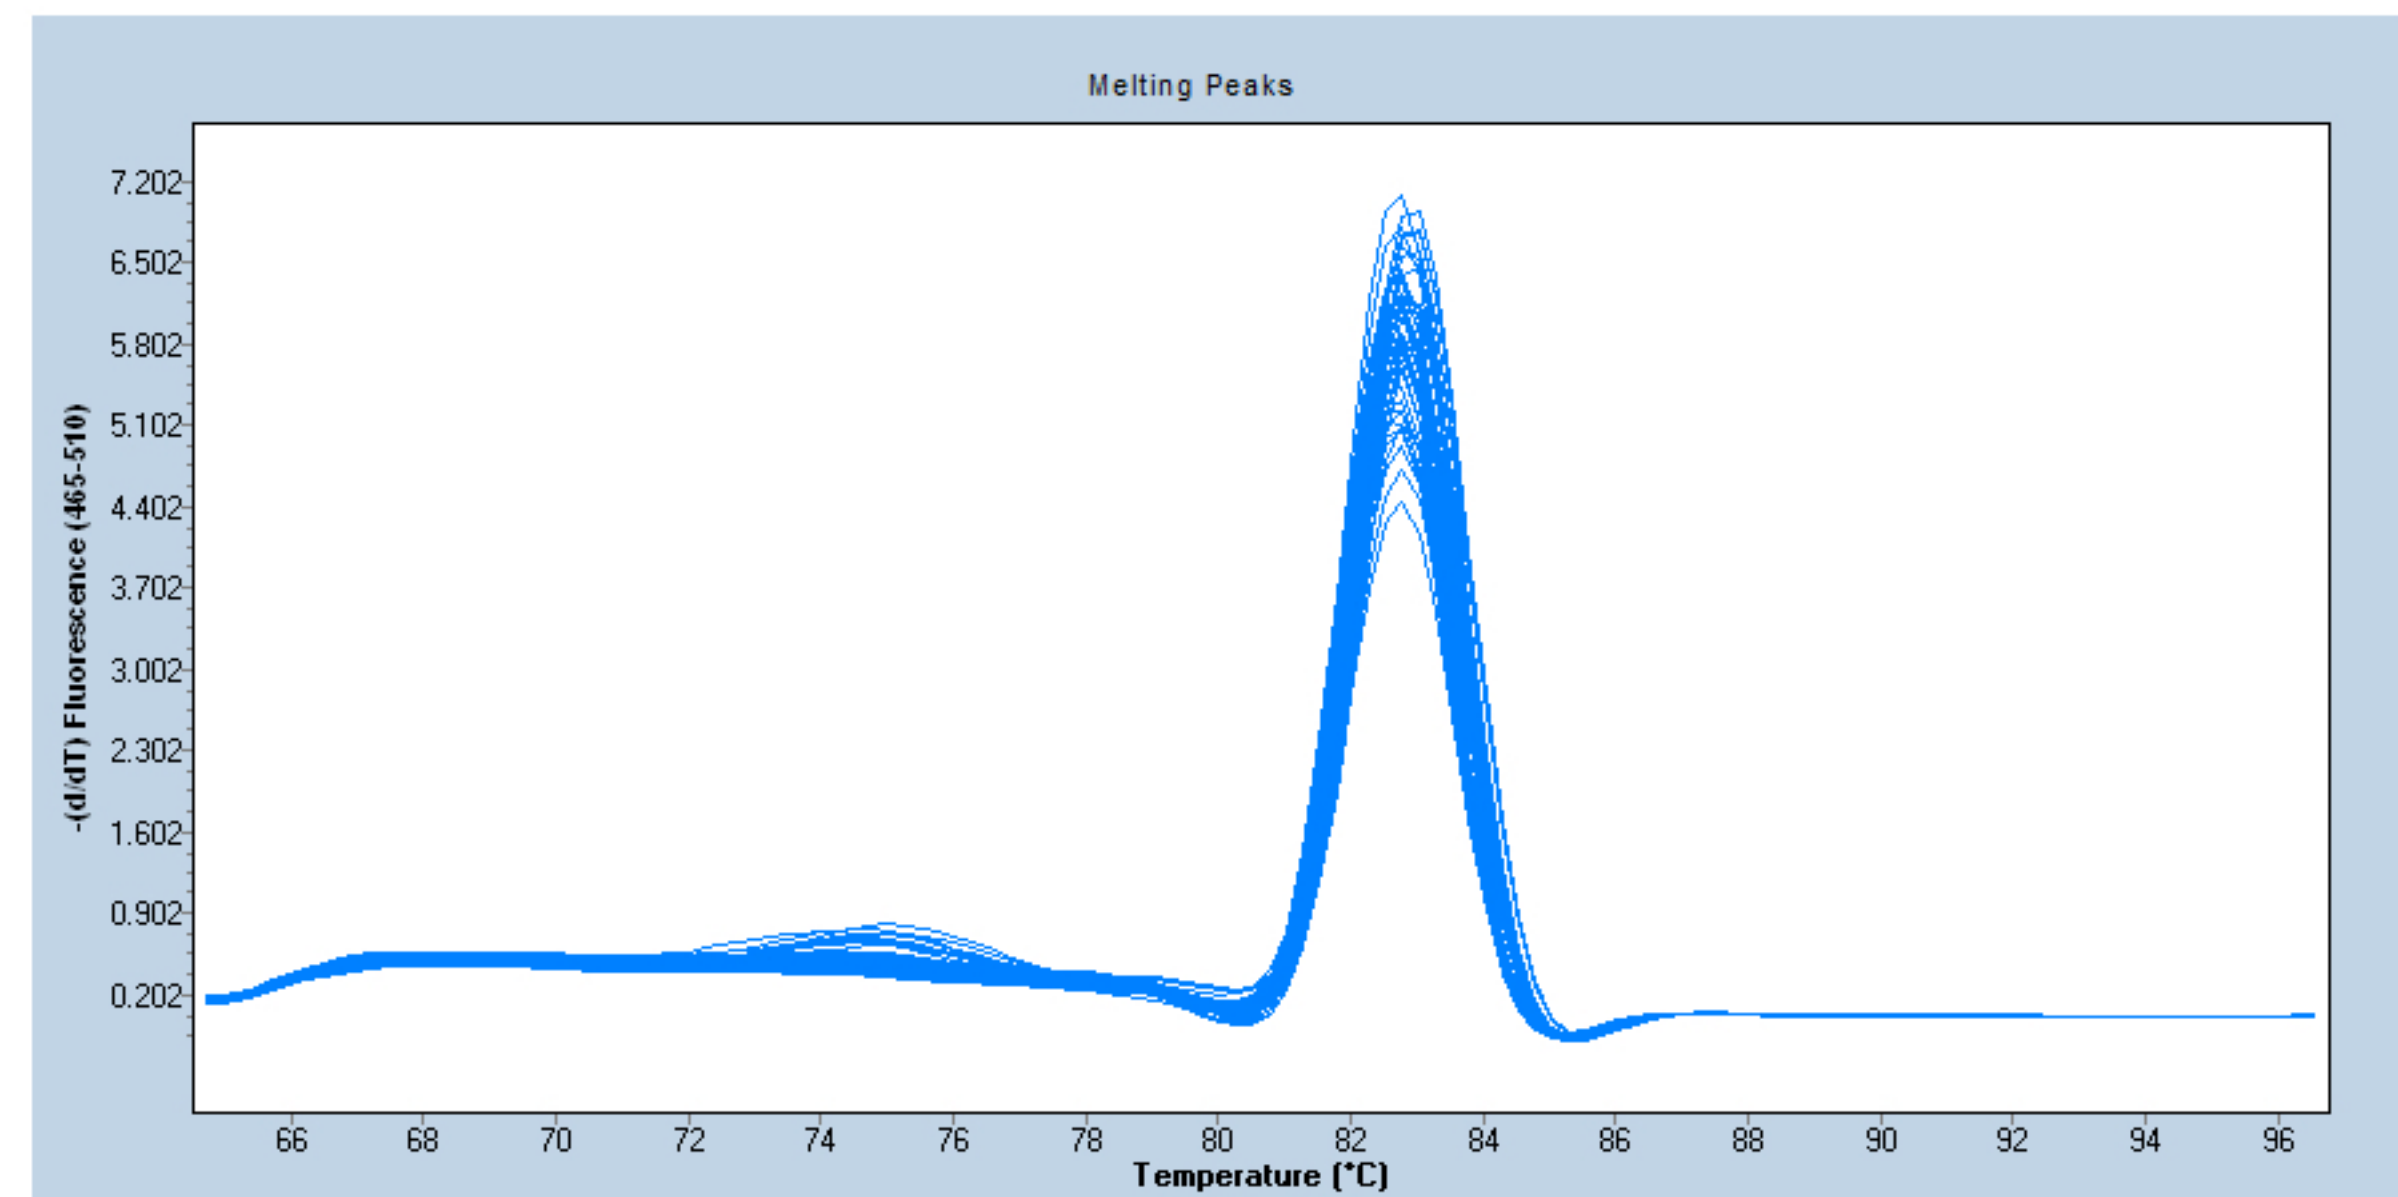

LNC\_014194

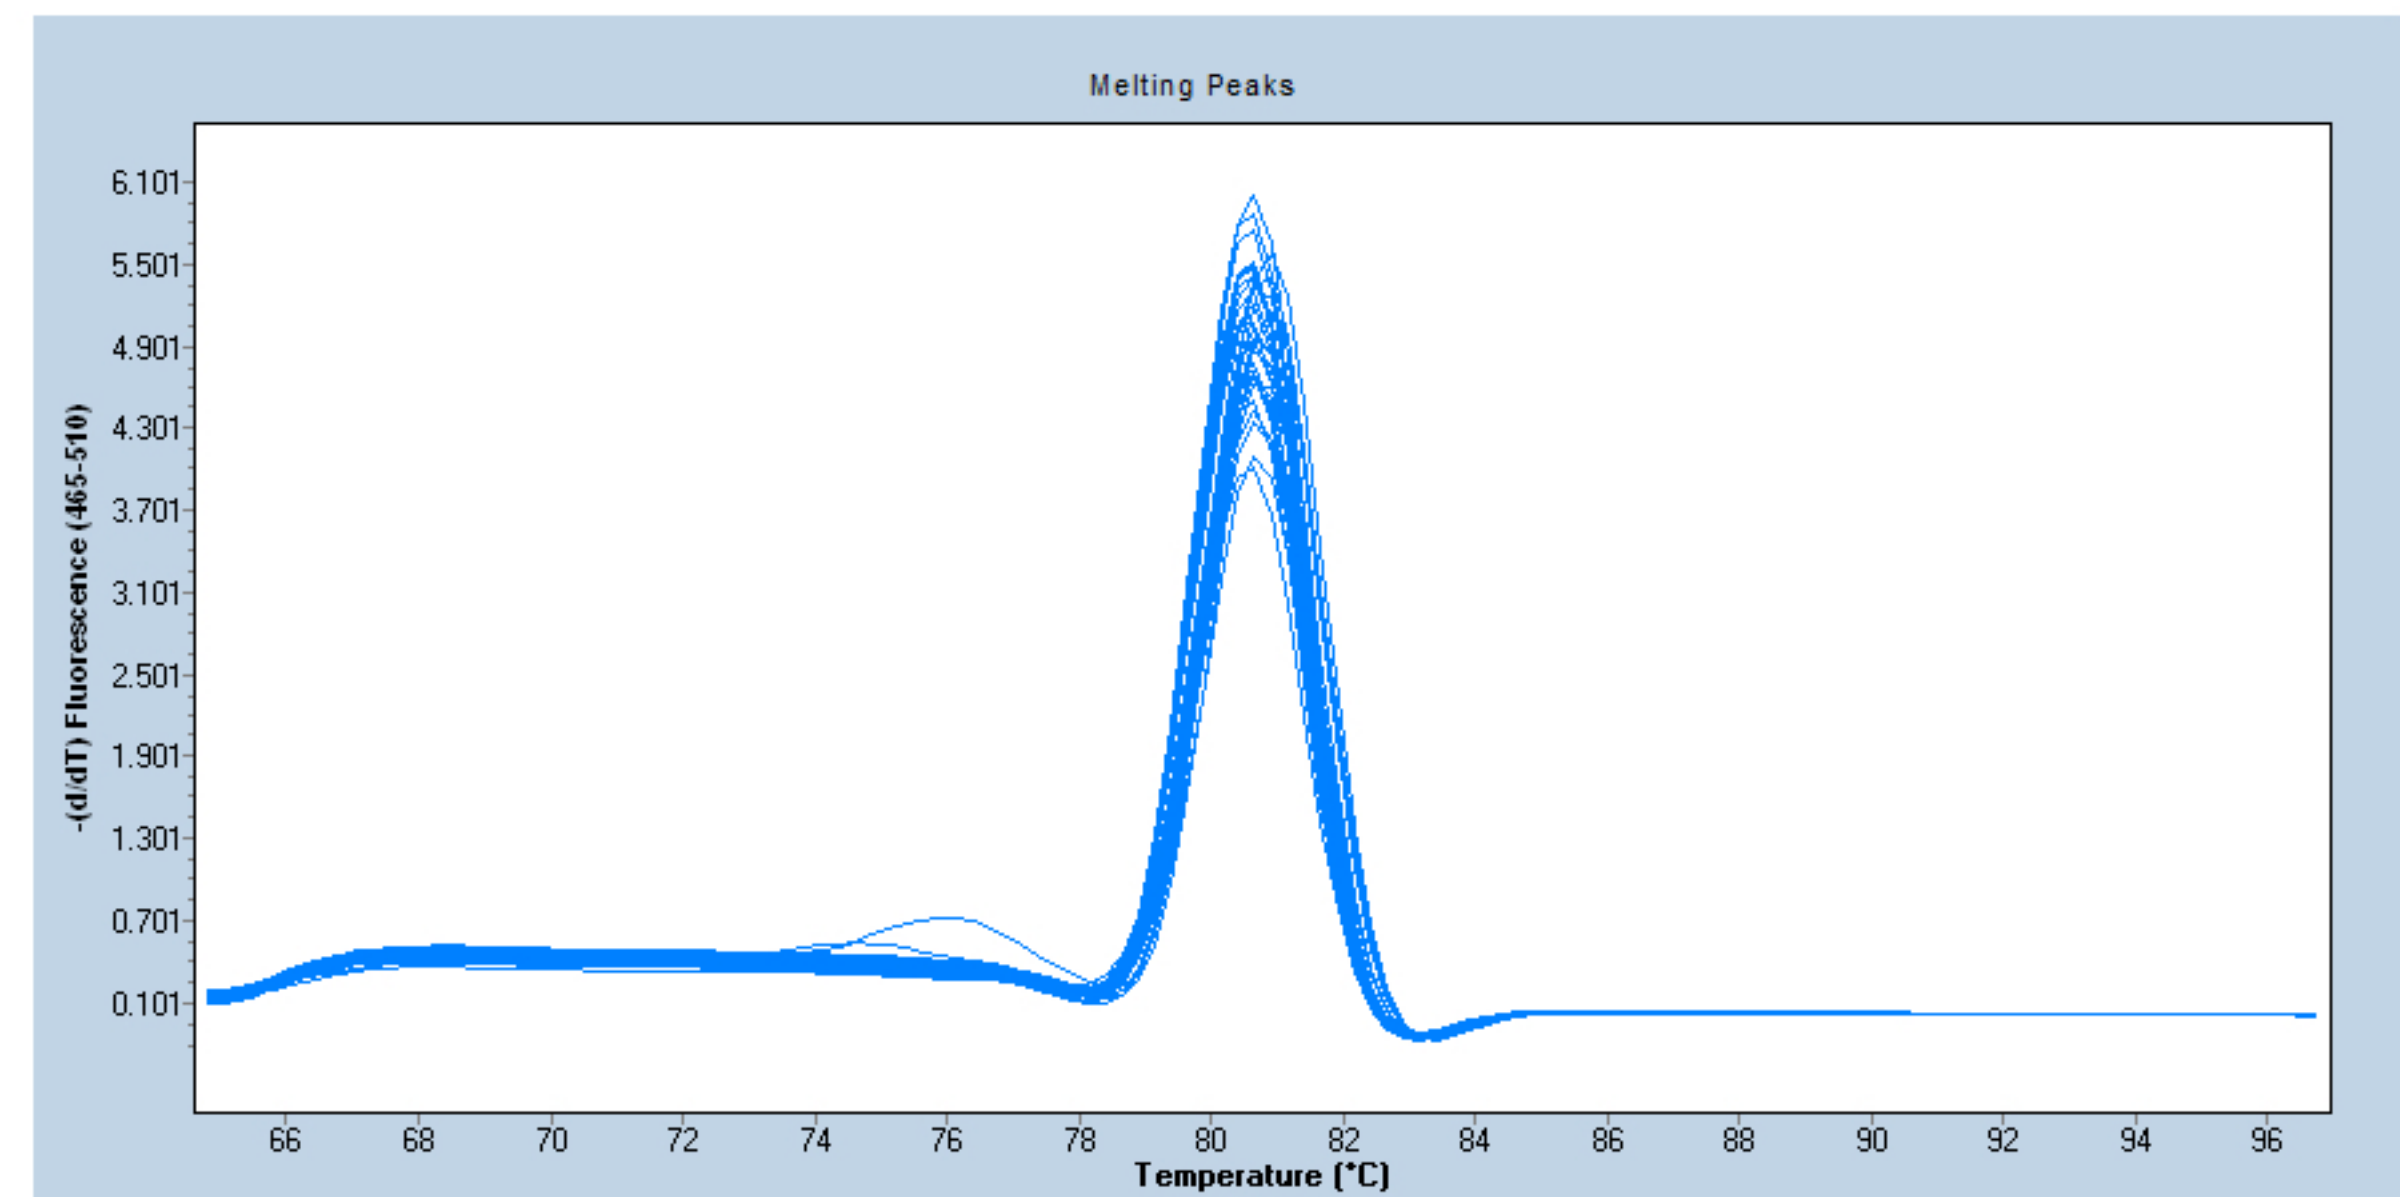

LNC\_015020

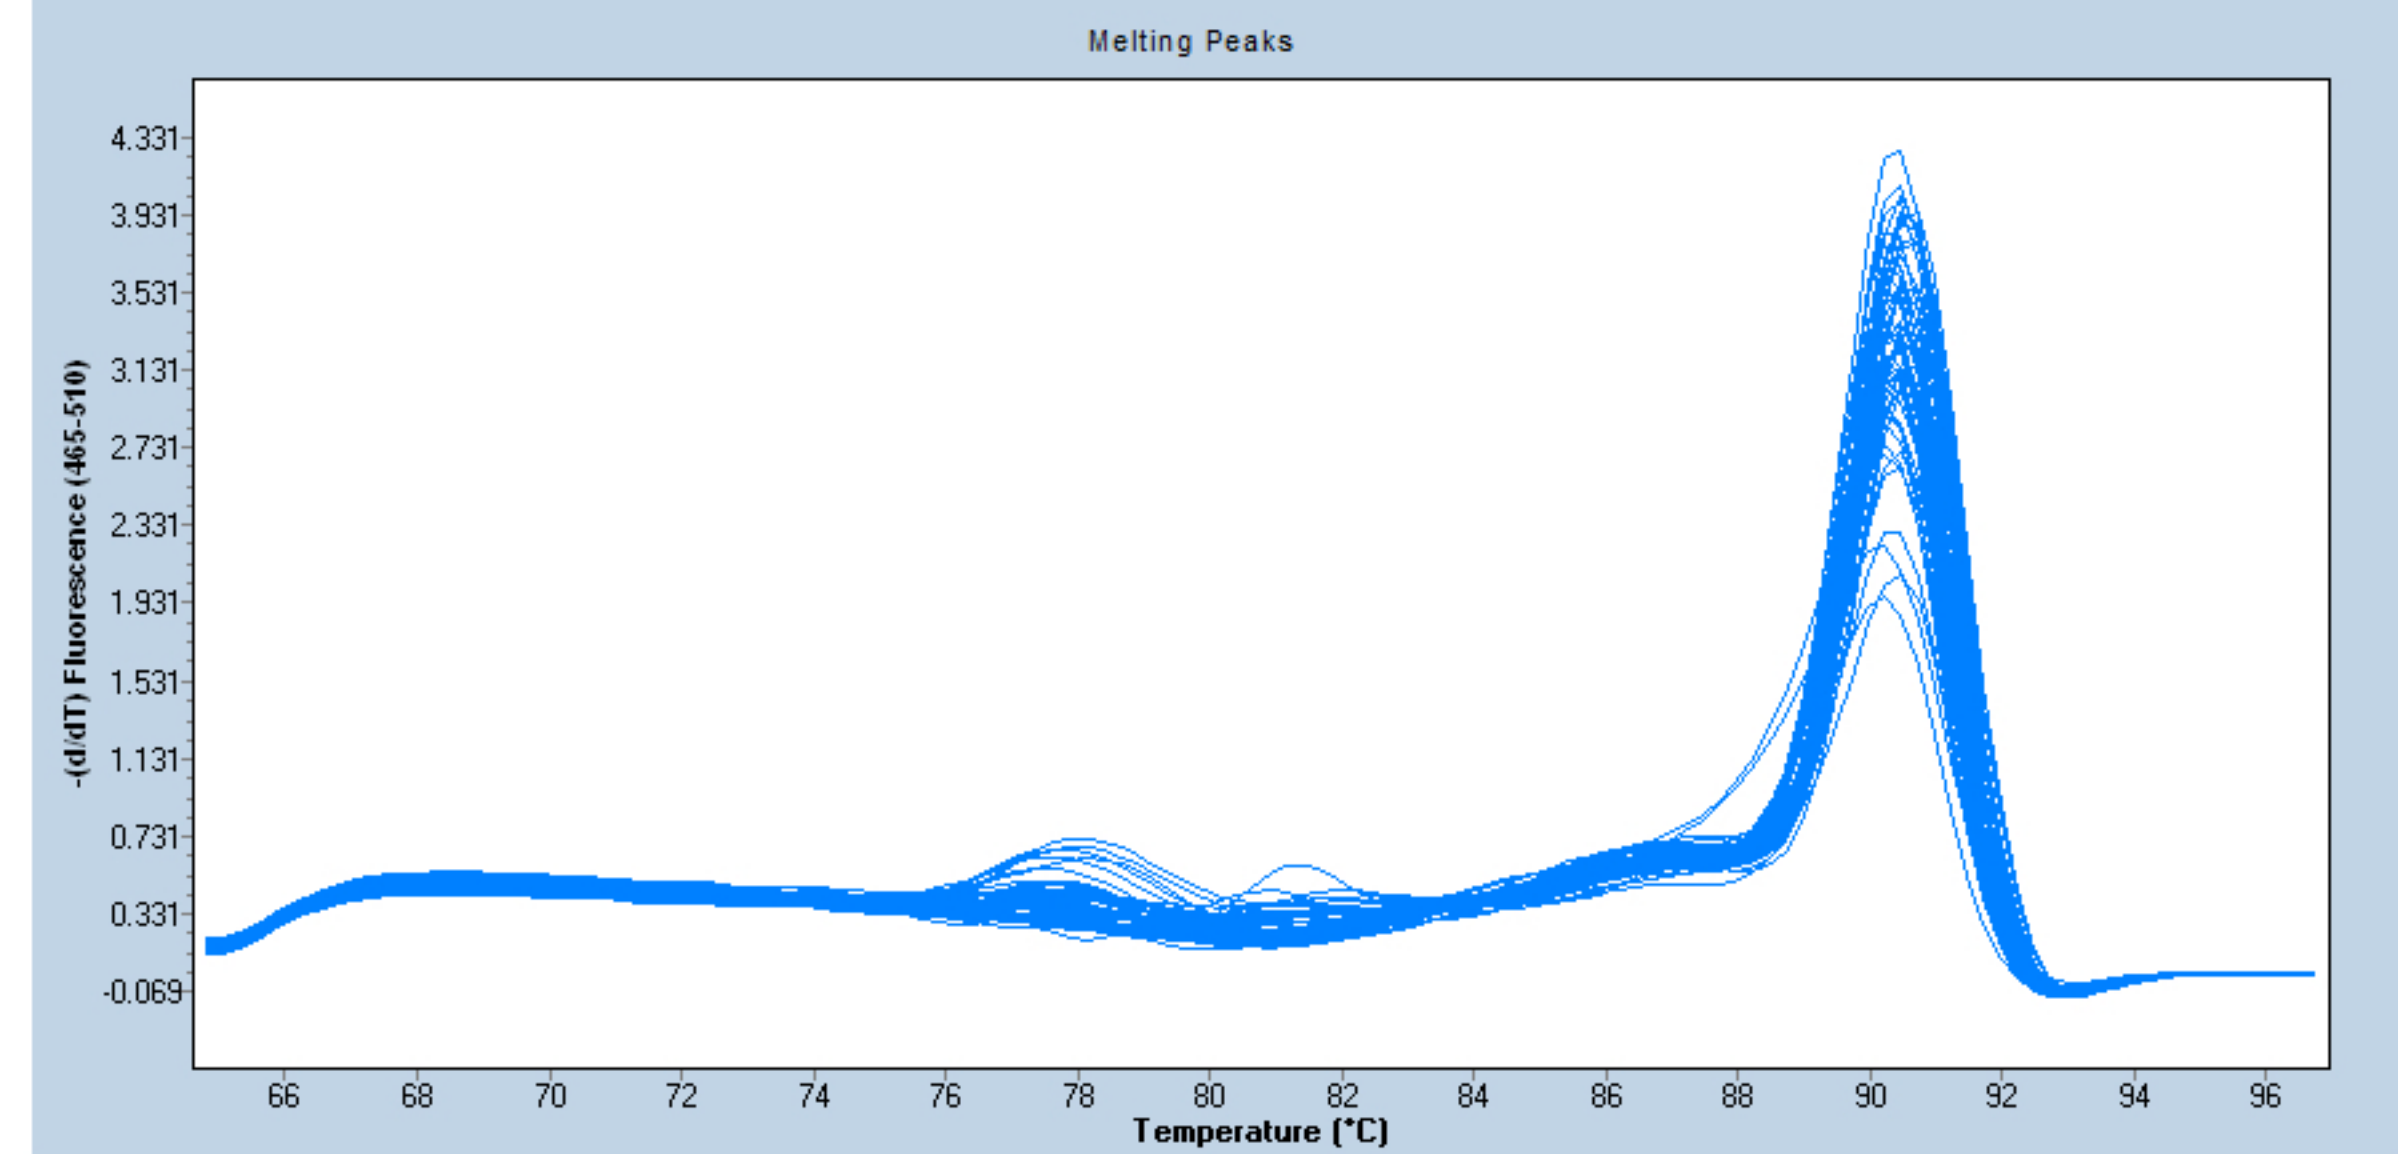

LNC\_018655

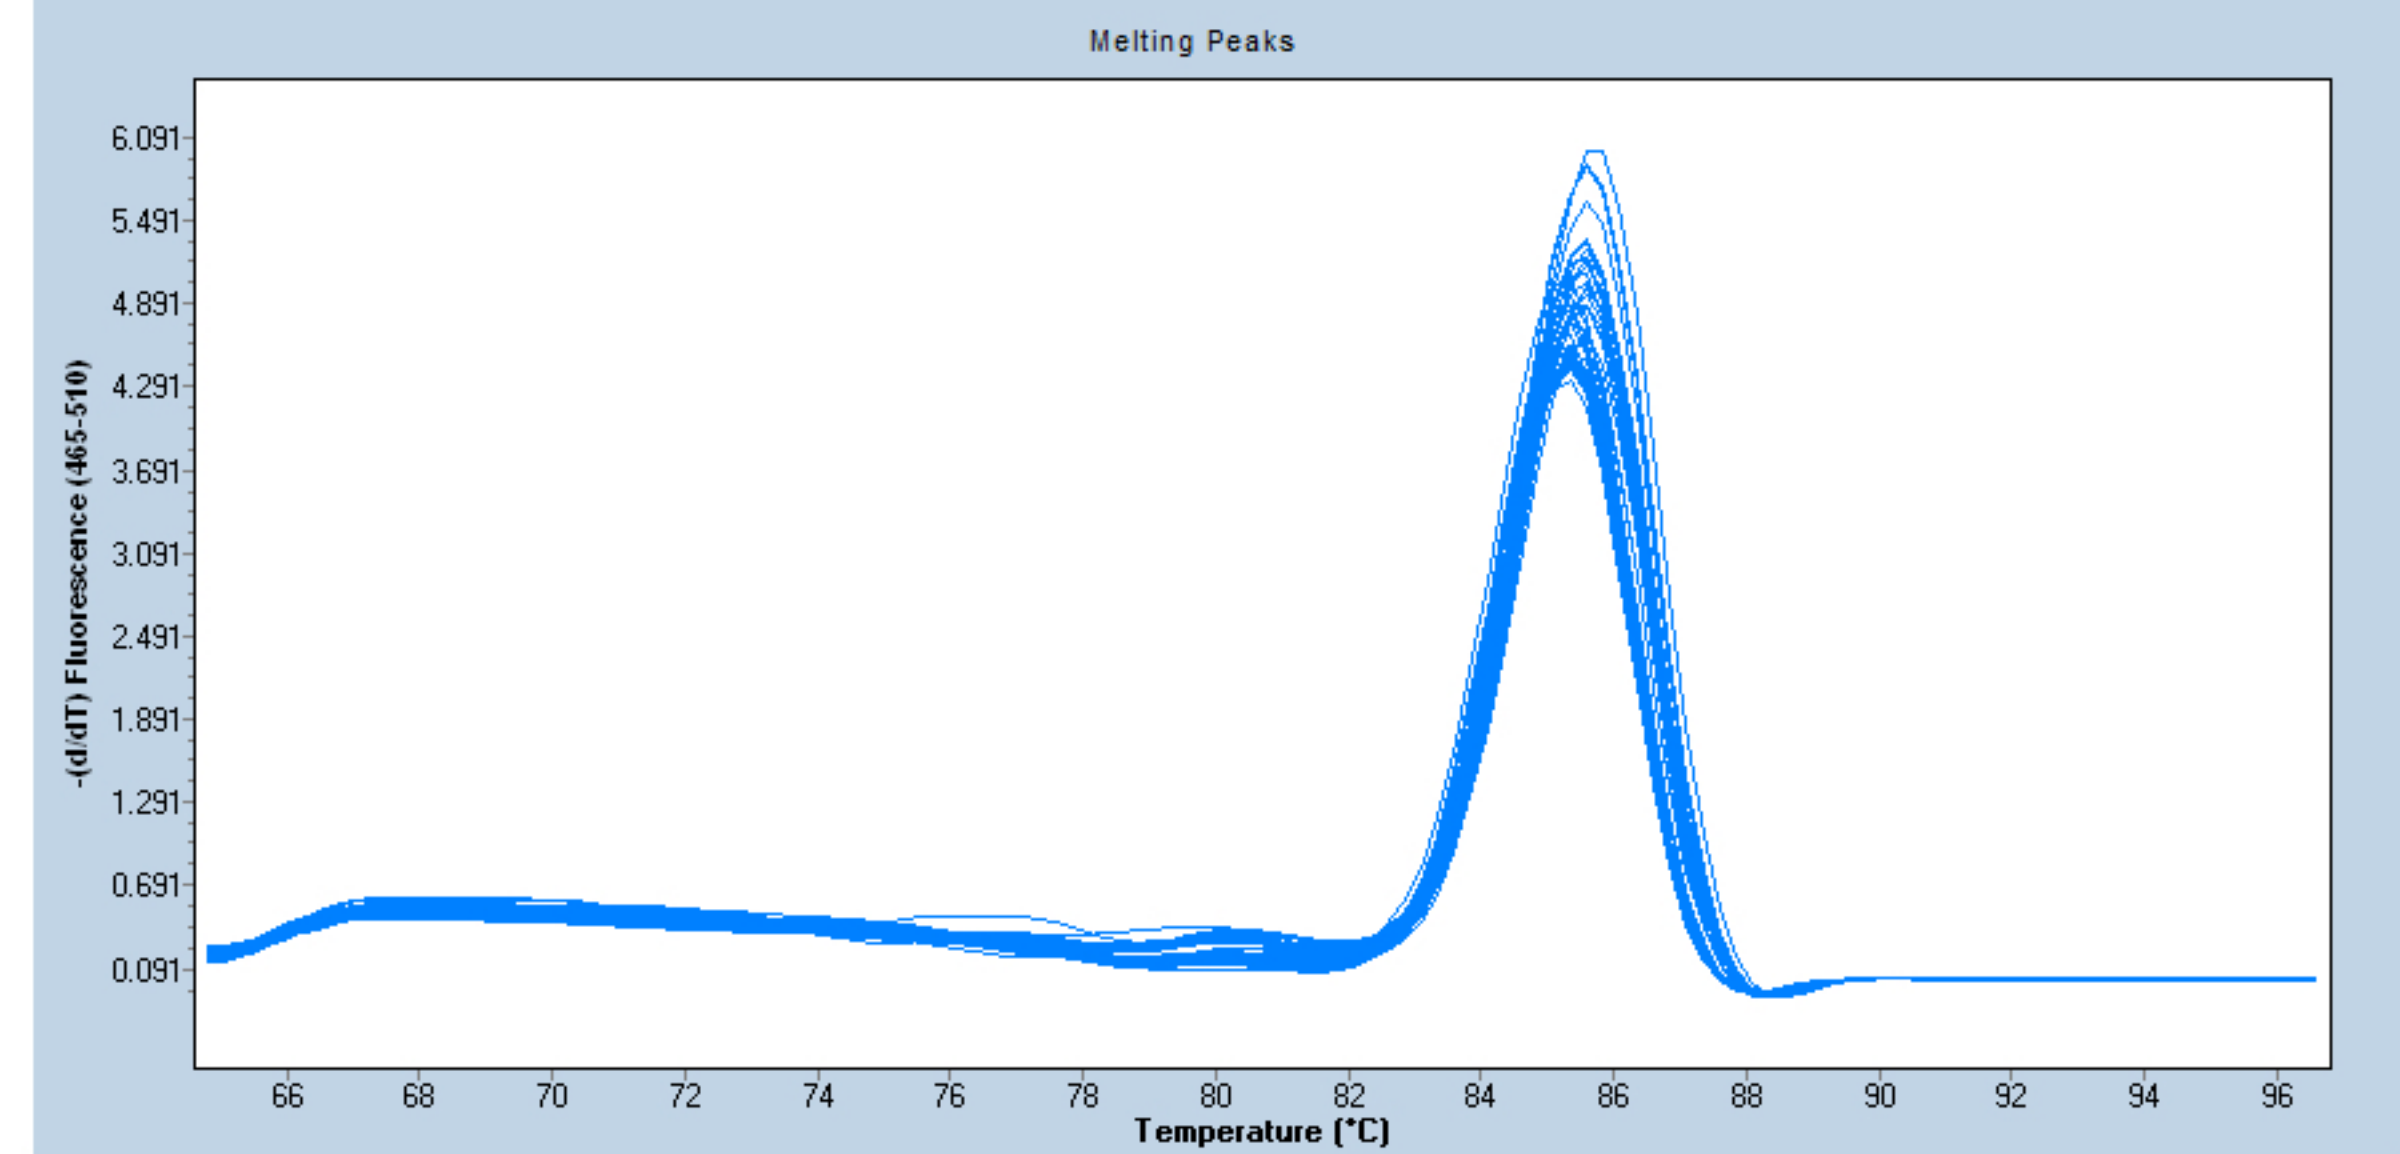

CDCA7

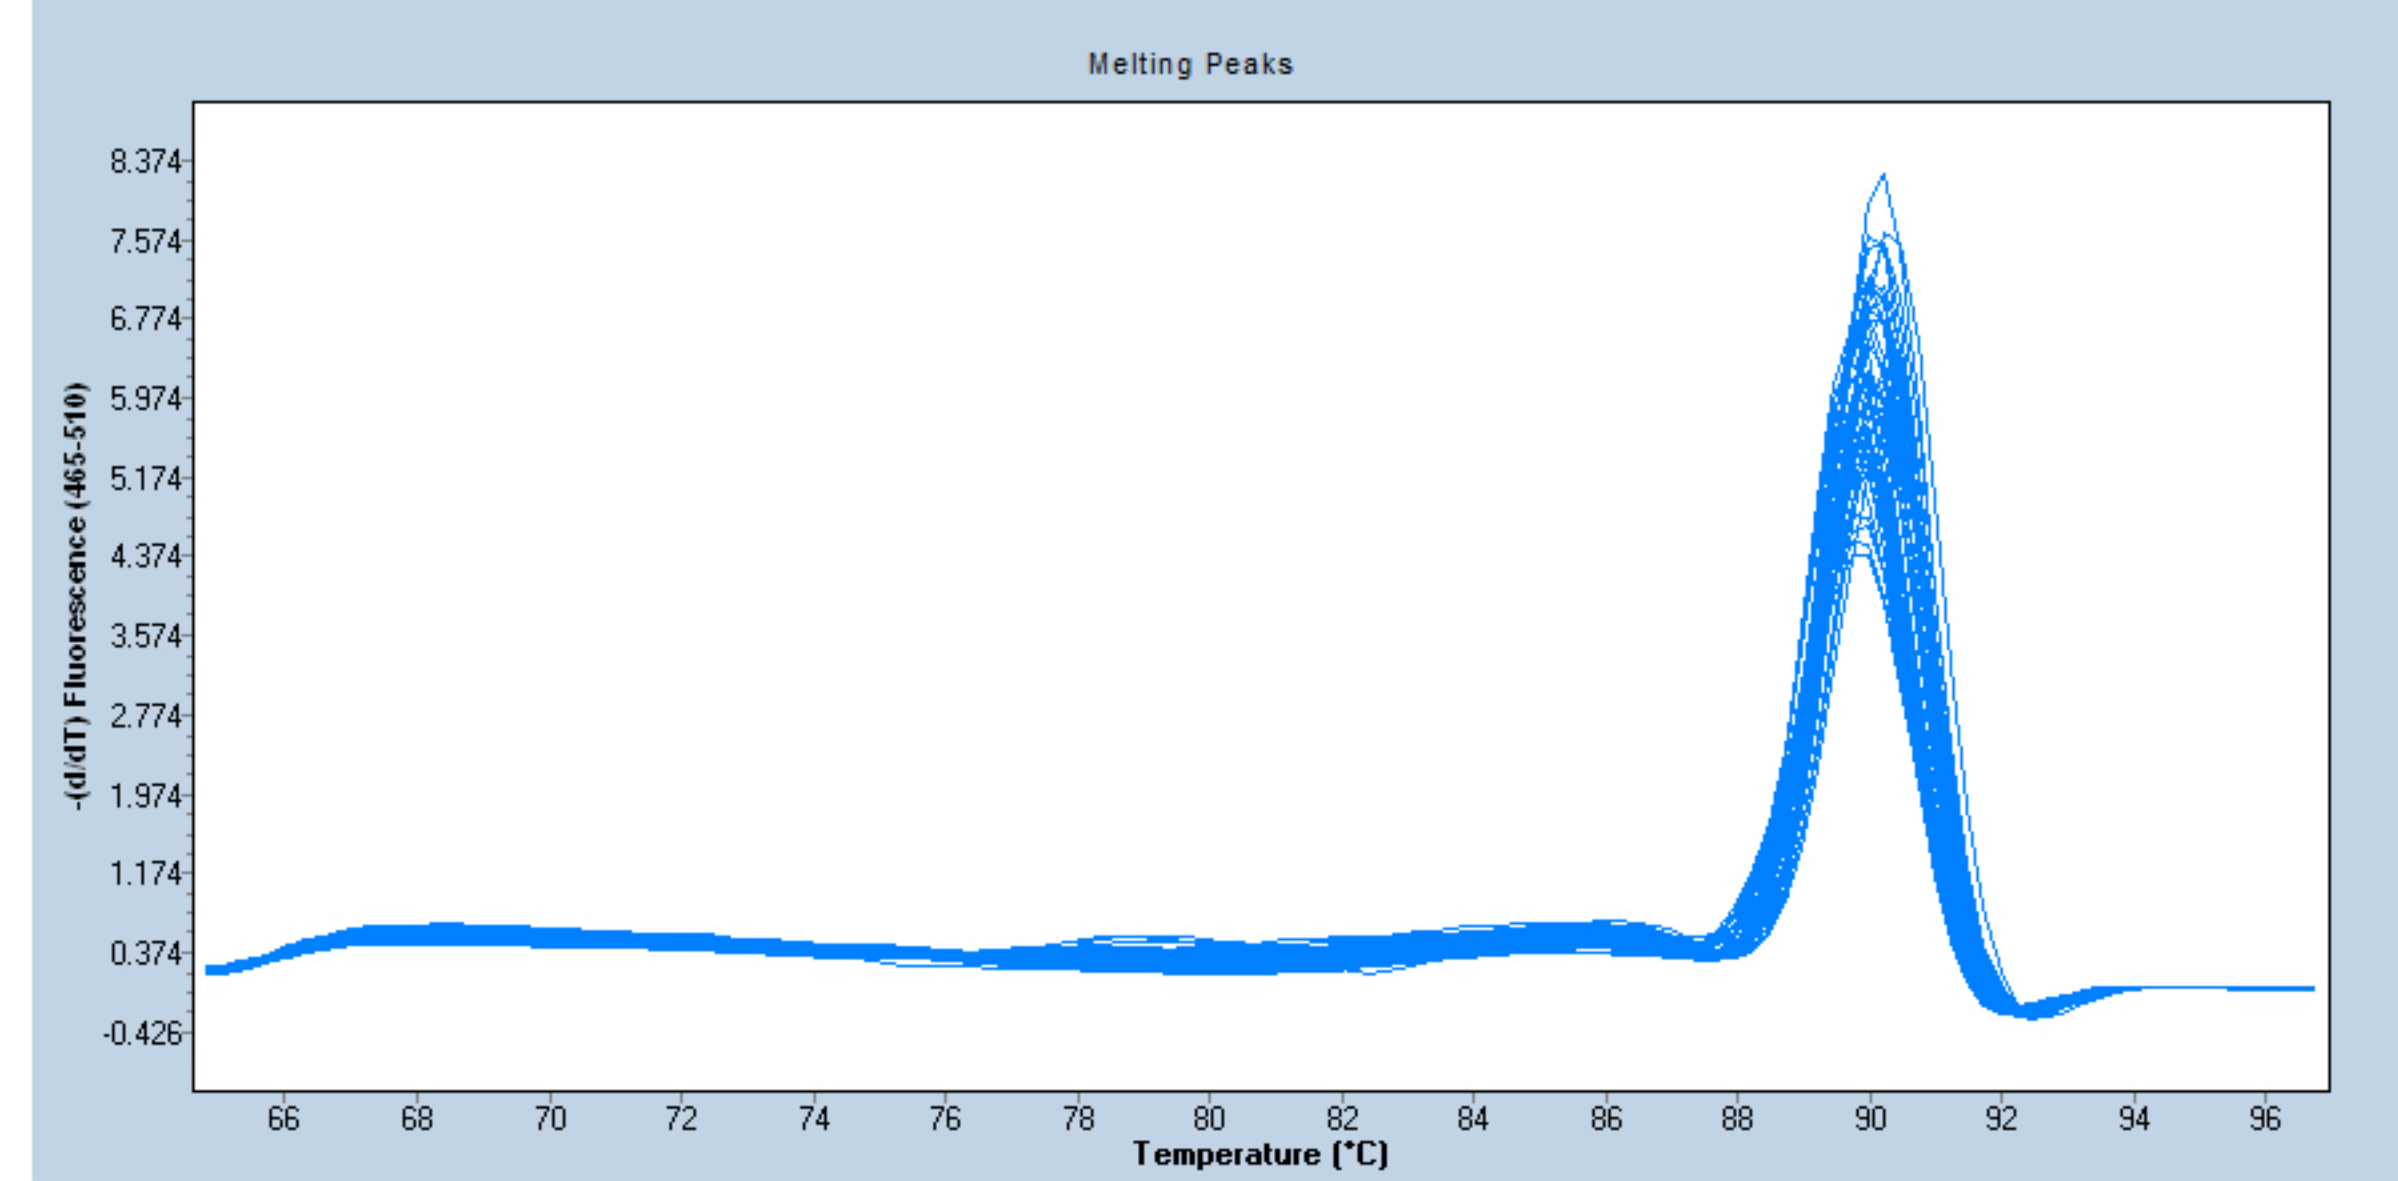

COL3A1

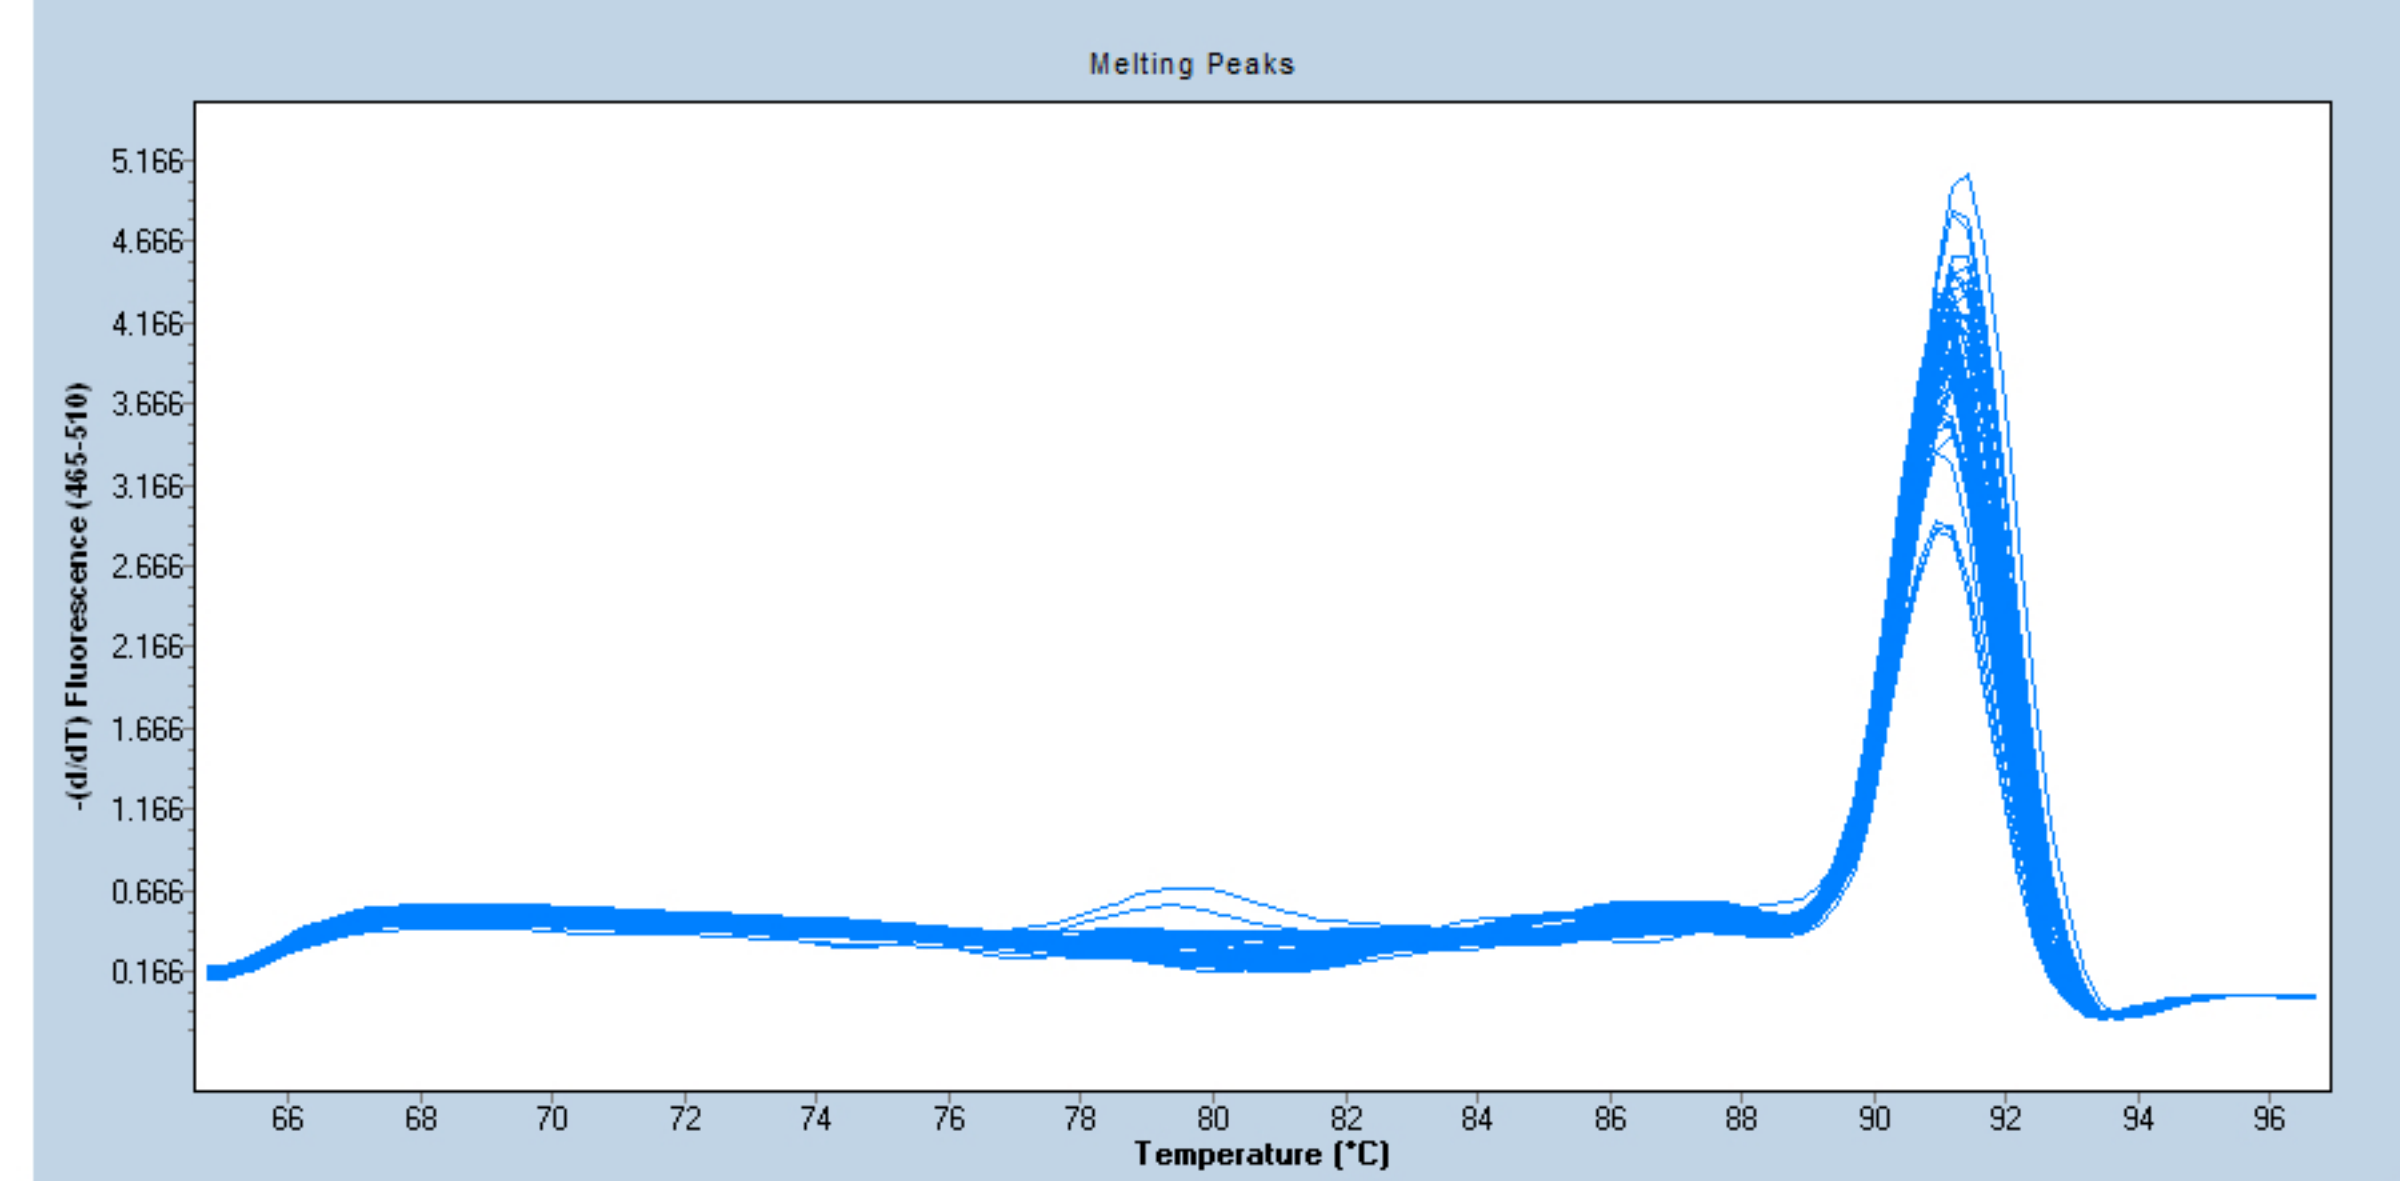

ECM2

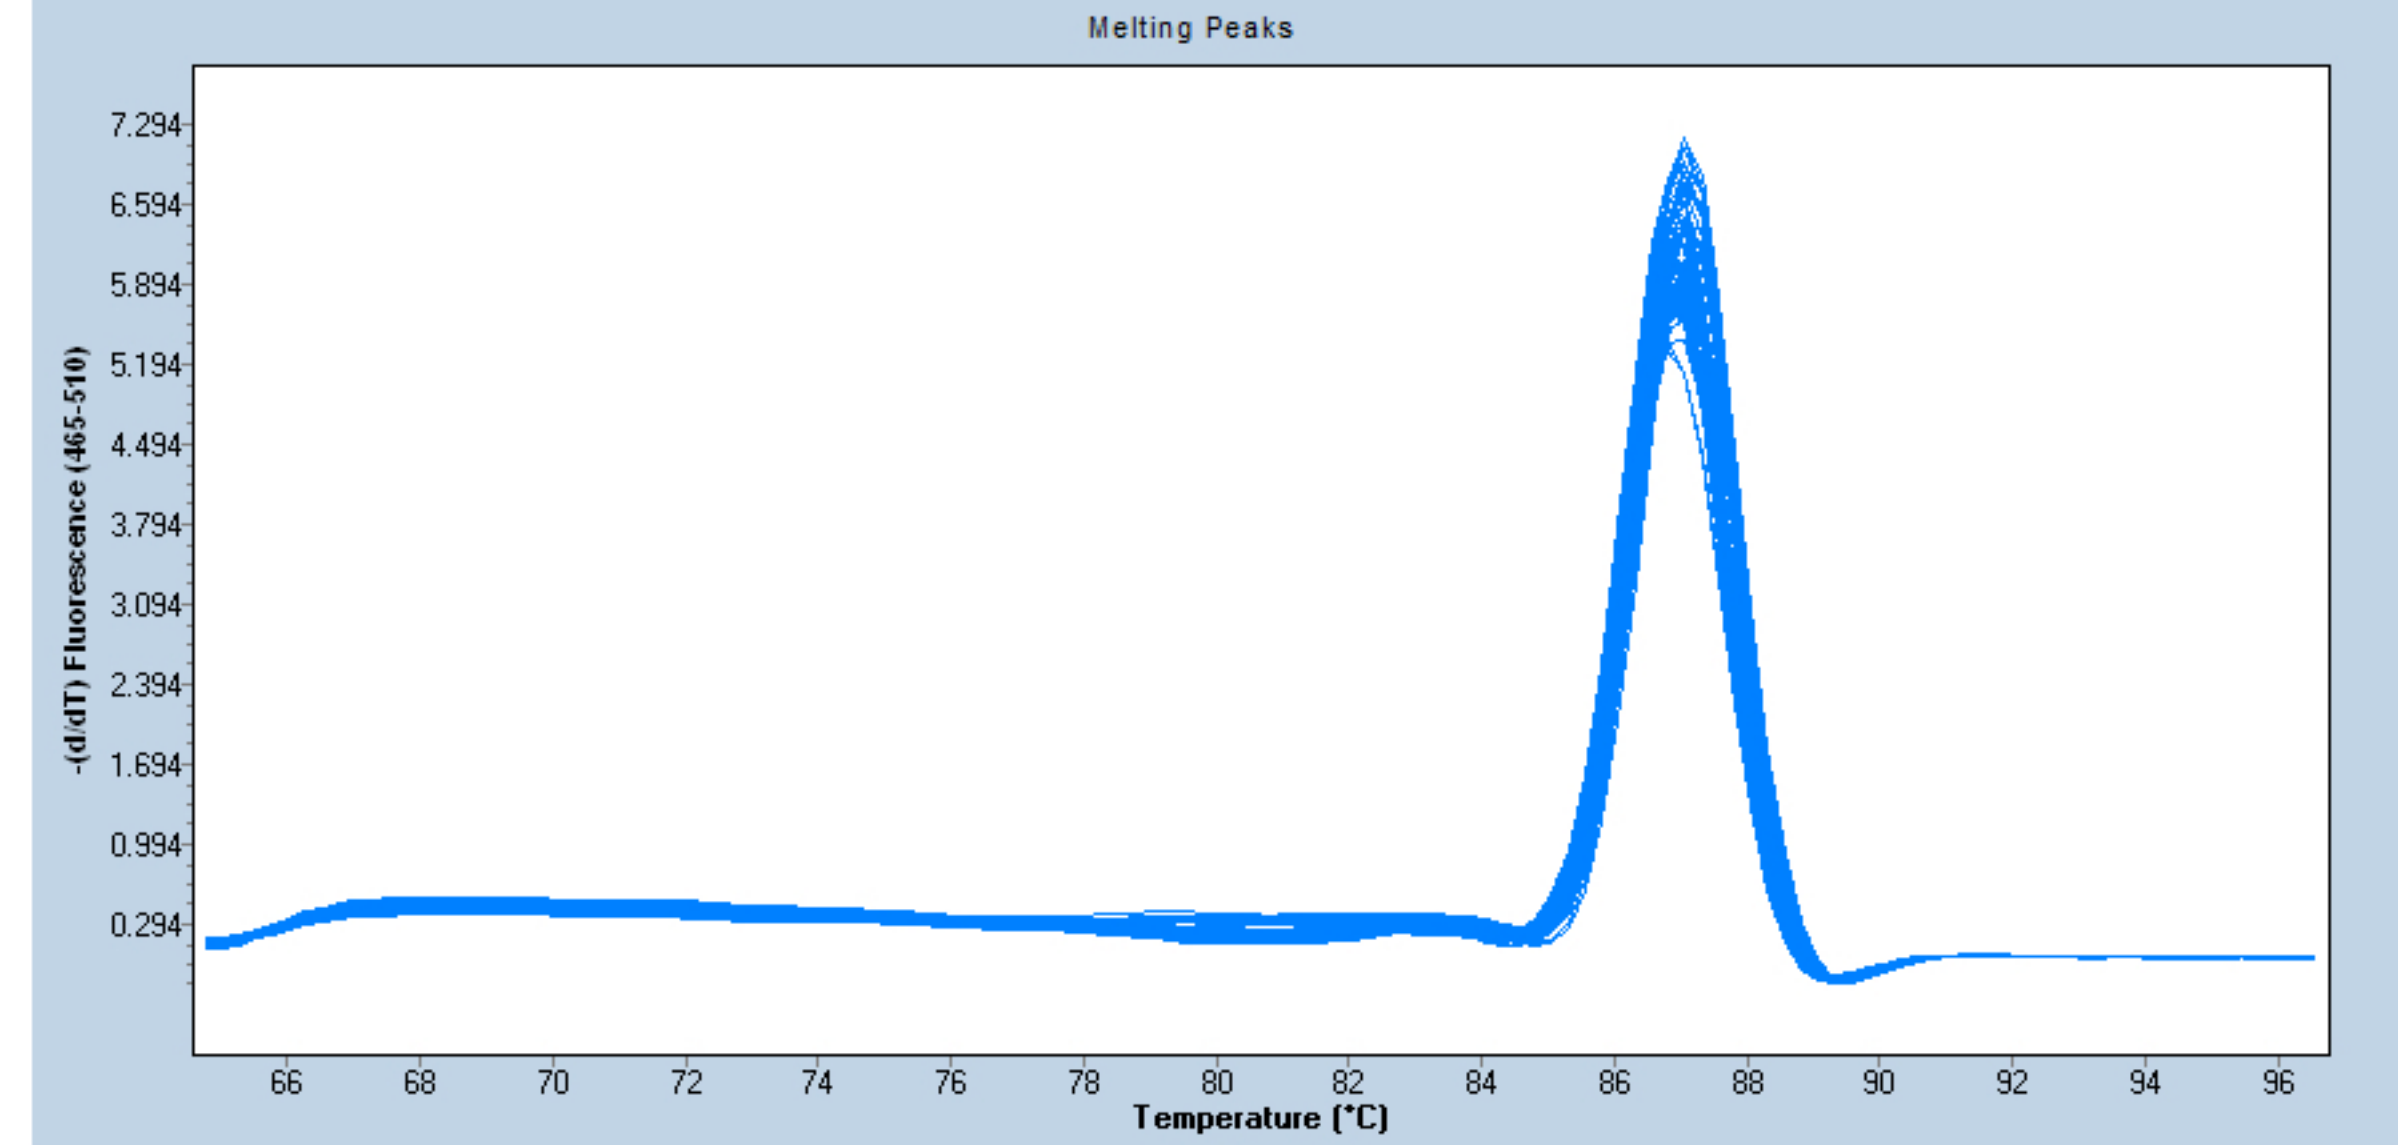

GMNT

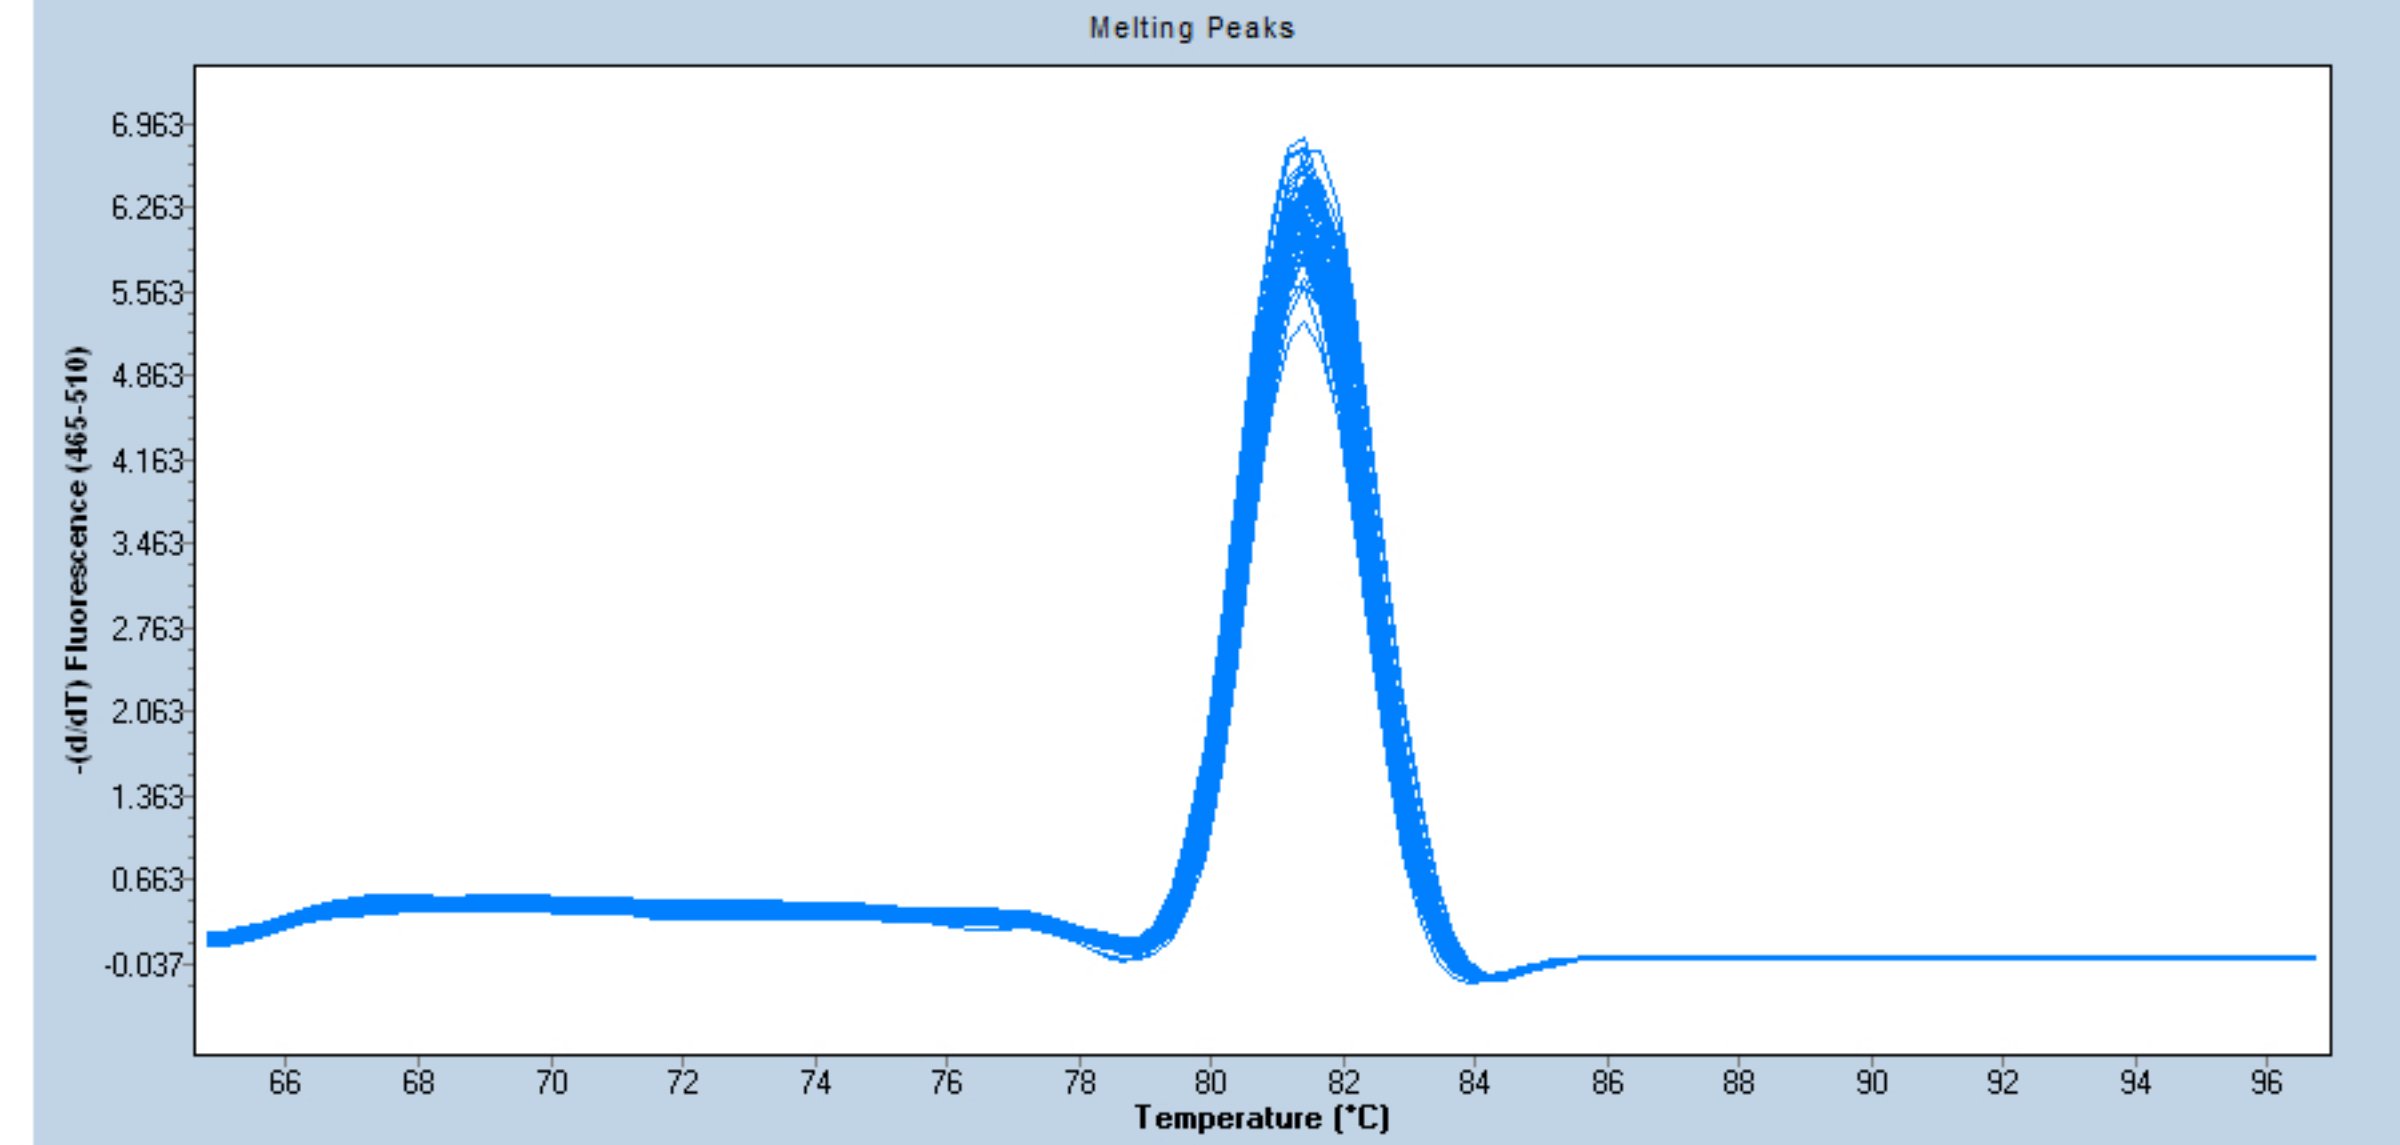

SDC2

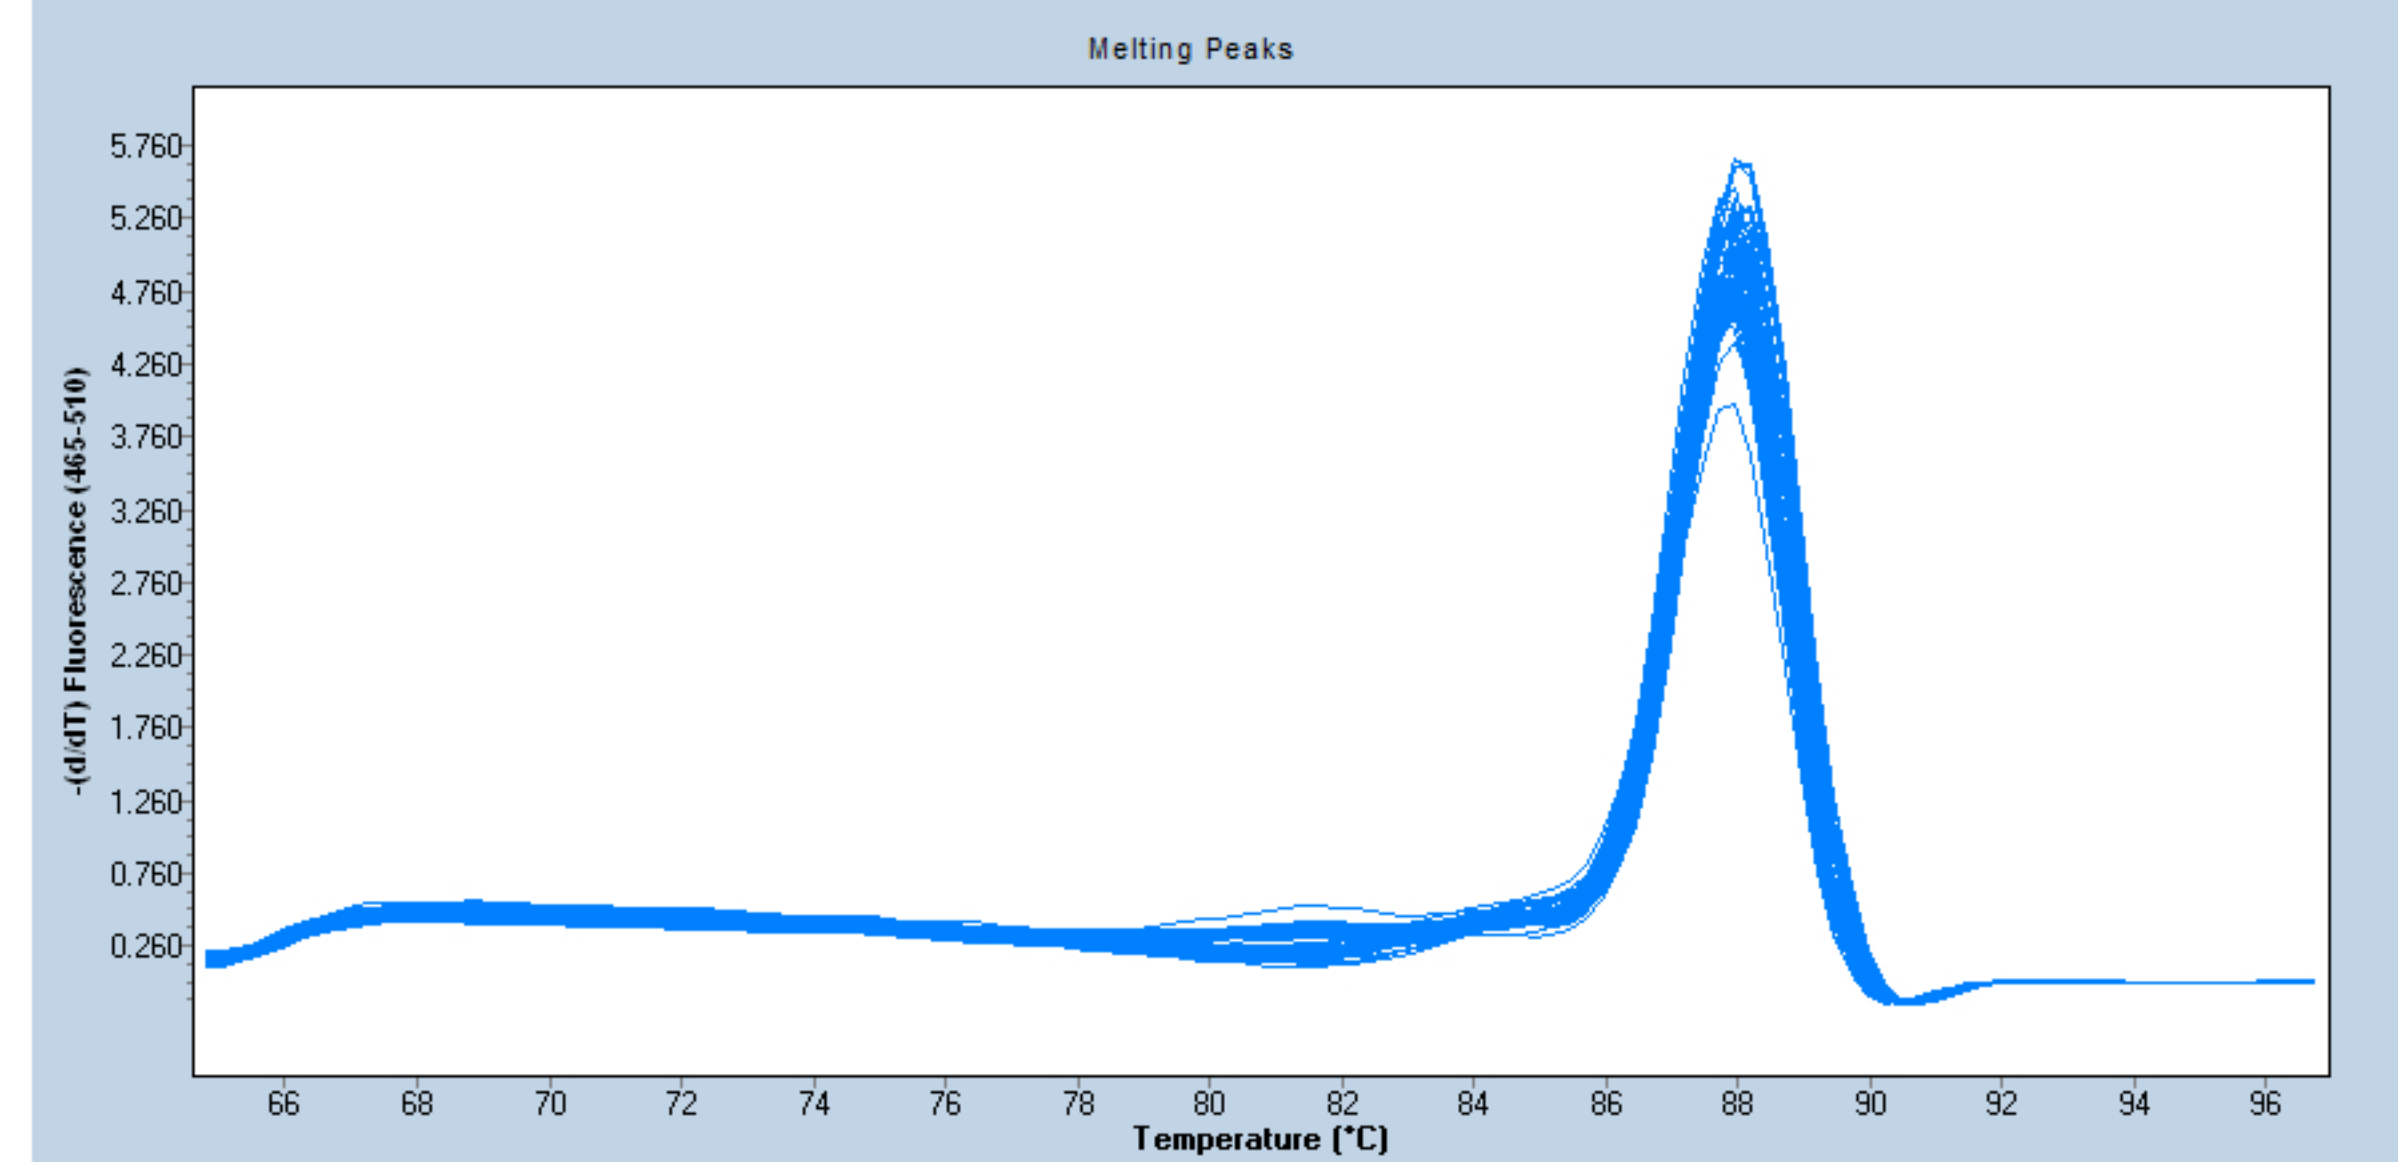

WARS

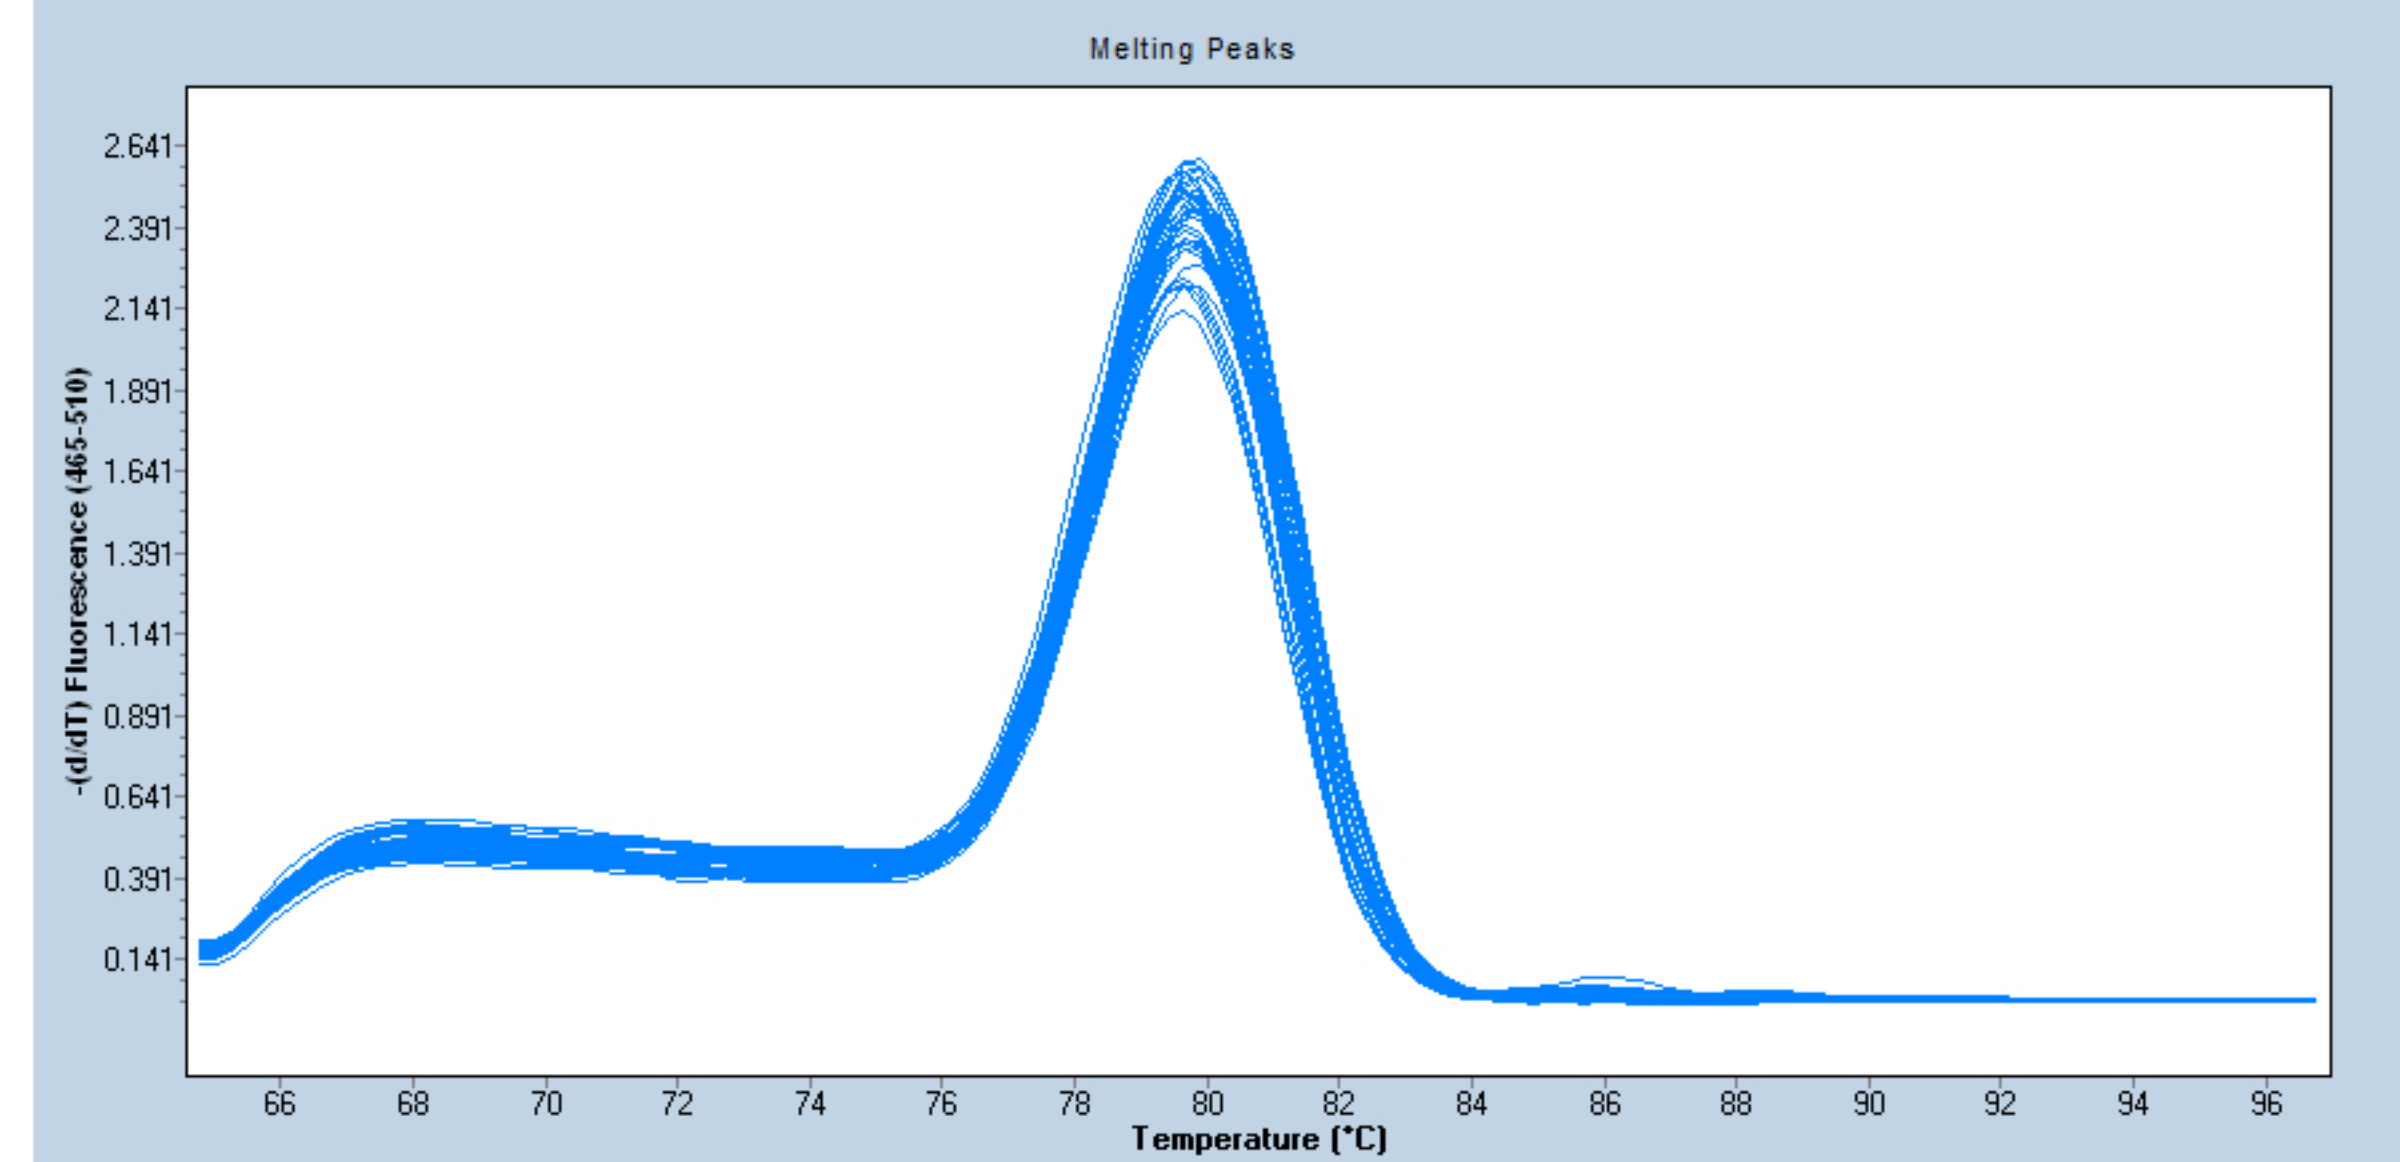

Supplement: Supplementary file [file 24779153]
